# 1 **Model-based detection of putative synaptic connections from spike recordings with latency and type** 2 **constraints**

3 Naixin Ren<sup>1</sup>, Shinya Ito<sup>2</sup>, Hadi Hafizi<sup>3</sup>, John M. Beggs<sup>3</sup>, and Ian H. Stevenson<sup>1</sup>

4 <sup>1</sup>Department of Psychological Sciences, University of Connecticut, Storrs, Connecticut, United States

5 <sup>2</sup>Santa Cruz Institute for Particle Physics, University of California, Santa Cruz, Santa Cruz, California, United States

6 <sup>3</sup>Department of Physics, Indiana University, Bloomington, Indiana, United States

## 7 8 **Abstract**

9 Detecting synaptic connections using large-scale extracellular spike recordings presents a statistical challenge.  
10 While previous methods often treat the detection of each putative connection as a separate hypothesis test, here  
11 we develop a modeling approach that infers synaptic connections while incorporating circuit properties learned  
12 from the whole network. We use an extension of the Generalized Linear Model framework to describe the cross-  
13 correlograms between pairs of neurons and separate correlograms into two parts: a slowly varying effect due to  
14 background fluctuations and a fast, transient effect due to the synapse. We then use the observations from all  
15 putative connections in the recording to estimate two network properties: the presynaptic neuron type (excitatory  
16 or inhibitory) and the relationship between synaptic latency and distance between neurons. Constraining the  
17 presynaptic neuron's type, synaptic latencies, and time constants improves synapse detection. In data from  
18 simulated networks, this model outperforms two previously developed synapse detection methods, especially on  
19 the weak connections. We also apply our model to *in vitro* multielectrode array recordings from mouse  
20 somatosensory cortex. Here our model automatically recovers plausible connections from hundreds of neurons,  
21 and the properties of the putative connections are largely consistent with previous research.

## 22 23 **Introduction**

24 Using *in vivo* or *in vitro* multielectrode arrays, the extracellular spiking of hundreds of neurons can be recorded  
25 simultaneously. These recordings are allowing new, large-scale studies of neuronal networks (Hahn et al. 2019;  
26 Harris et al. 2003; Levenstein et al. 2019; Okun et al. 2015; Tingley and Buzsáki 2018), and the number of  
27 neurons that can be simultaneously recorded is increasing approximately exponentially (Stevenson and Kording  
28 2011). Depending on the species, brain area, and electrode configuration, these simultaneously recorded  
29 neurons can have tens of thousands of potential synapses between them. Detecting and characterizing these  
30 synapses represents a major challenge for neural data analysis. Here, we develop a model-based method  
31 incorporating network-level constraints on 1) the presynaptic neuron type and 2) the synaptic latencies between  
32 pre- and postsynaptic neurons. We examine whether these constraints can improve synapse detection using  
33 simulated data and large-scale *in vitro* multielectrode array recordings.

34  
35 Detecting synaptic connections from extracellular spike observations is a difficult statistical problem. Since both  
36 spiking and synapses themselves are sparse, it is often difficult to distinguish between changes in spike  
37 probability that are due to a specific synaptic input, changes that are due other (typically unobserved) inputs, or  
38 due to chance. Using extracellular spike data, researchers often identify putative monosynaptic connections by  
39 examining cross-correlograms between the spiking of two neurons. If two neurons are connected, there will often

40 be a fast-onset, short-latency peak (excitatory) or trough (inhibitory) in the cross-correlogram, where the post-  
41 synaptic neuron tends to spike more (excitatory) or less (inhibitory) following a pre-synaptic spike. Previous  
42 methods for distinguishing putative synaptic connections and non-connections in large-scale recordings used  
43 hypothesis testing to ask whether a peak or trough is significantly different from a baseline level of expected  
44 spiking (Barthó et al. 2004; Fetz et al. 1991; Fujisawa et al. 2008; Hatsopoulos et al. 2003; Perkel et al. 1967a).  
45 These models typically treat decisions about the presence or absence of a synapse between each pair of  
46 neurons as separate hypothesis tests. However, synapses from the same presynaptic neuron are likely to share  
47 certain properties, and these shared properties could potentially improve the detection of synaptic connections.  
48 Here we aim to incorporate information from two basic features of neural circuits: 1) that neurons tend to be  
49 either excitatory or inhibitory and not both (Dale's Law (Eccles et al. 1954)), and 2) that the synaptic latency  
50 between a pair of neurons should grow with the distance between the neurons (all else being equal). For example,  
51 knowing that there is an excitatory connection from neuron A to neuron B, increases the chances that other  
52 connections from neuron A should be excitatory. Similarly, if the distance between neuron A and B is known, then  
53 the latency of that connection provides some information about what latencies we might expect for neuron A's  
54 other connections. These sources of information could potentially allow weak connections that are consistent  
55 with the circuit to be more readily detected and false positives due to noise to be rejected when that noise is  
56 inconsistent with the circuit.

57  
58 To apply these circuit-level constraints, here we develop an extension of a Generalized Linear Model to describe  
59 cross-correlograms between pairs of neurons and to automatically detect putative synaptic connections. In  
60 contrast to the traditional hypothesis testing approach, here we fit an explicit model for the rate of post-synaptic  
61 spiking at each interval relative to the presynaptic neuron's firing. This model includes both a fast, transient  
62 synaptic effect and a slower effect that accounts for potentially fluctuating baseline correlation. Based on Dale's  
63 law and the expected linear relationship between distance and synaptic latency, we rule out false positives by  
64 constraining presynaptic neuron type, synaptic latencies, and time constants. We then evaluate our model using  
65 two simulated integrate-and-fire networks. Our model outperforms previous synapse detection methods: spike  
66 jitter method and thresholding method, especially on the weak connections. We also apply our model to *in vitro*  
67 multielectrode array (MEA) data, where our model recovers plausible connections between hundreds of neurons  
68 in a slice culture of mouse somatosensory cortex. Many of the neurons appear to follow approximately linear  
69 distance-latency relationships, and neurons with excitatory/inhibitory connections often have waveforms that are  
70 wide/narrow, consistent with previous research (Barthó et al. 2004). Altogether, by incorporating constraints due  
71 to circuit structure, the model-based approach presented here may allow more accurate automated detection of  
72 synapses from large-scale spike recordings.

## 74 **Methods**

### 76 **Extended Generalized Linear Model for Synaptic Detection**

78 Here we develop an extension of a generalized linear model (GLM) to describe the spike correlograms between  
79 pairs of neurons: a suspected presynaptic neuron  $i$  and postsynaptic neuron  $j$ . For the binned spike trains of the  
80 two neurons,  $n_i$  and  $n_j$  (1 when there is a spike and 0 otherwise), the cross-correlogram is given by

$$y_{ij}(m) = \sum_t n_i(t)n_j(t-m)$$

82 where  $m$  denotes the interval between pre- and postsynaptic spikes, and  $y_{ij}(m)$  is the number of the times  
83 spikes in  $n_i$  and  $n_j$  are separated by an interval  $[m - \frac{1}{2\Delta t_{bin}}, m + \frac{1}{2\Delta t_{bin}})$  for binsize  $\Delta t_{bin}$  (0.5 ms here).

84  
85 We then model the cross-correlogram using two components: 1) a slow effect caused by fluctuating firing rates  
86 and common input from other neurons, and 2) a fast effect caused by a potential synaptic connection. Namely,  
87 we model the rate of counts  $\lambda_{ij}$  as a linear combination of the slow effect and the fast effect passed through an  
88 output nonlinearity:

$$\lambda_{ij} = \exp(\beta_0 + X_c\beta_c + w_{ij} \alpha(\tau, \Delta t))$$

90 where  $\beta_0 + X_c\beta_c$  describes the slow effect and  $w_{ij} \alpha(\tau, \Delta t)$  describes the fast effect. For the slow effect,  $X_c$   
91 represents a set of smooth basis functions learned by applying a low-rank, nonlinear matrix factorization to all  
92 the cross-correlograms in the dataset (see below). For the fast effect, we use an alpha function  $\alpha(\tau, \Delta t) =$   
93  $\frac{t-\Delta t}{\tau} \exp\left(1 - \frac{t-\Delta t}{\tau}\right)$ , with a latency  $\Delta t$  and a time constant  $\tau$ , while  $w_{i,j}$  represents the connection strength from  
94 neuron  $i$  to neuron  $j$  (positive for excitatory connections, negative for inhibitory).  $\beta_0$ ,  $\beta_c$ ,  $\Delta t$ ,  $\tau$ , and  $w_{i,j}$  are the  
95 parameters that are estimated in the model (see below for the details about optimization). In addition to this  
96 extended GLM (the full model), we also fit a reduced, slow model,  $\lambda_{ij} = \exp(\beta_0 + X_c\beta_c)$ , which only contains the  
97 basis functions without the alpha function to capture the synaptic effect. If the full model substantially outperforms  
98 the slow model, we can infer that there is putative synaptic connection from the pre- to postsynaptic neuron.  
99 Note that, although the full model is similar in structure to the traditional Poisson GLM, the parameters of the  
100 alpha function are not linear, and cannot be optimized using traditional reweighted least-squares methods.

## 102 Parameter Estimation

103  
104 To fit the cross-correlogram  $y_{ij}$  using the slow model  $\lambda_{ij} = \exp(\beta_0 + X_c\beta_c)$ , we minimize the negative Poisson  
105 log-likelihood:  $l_{slow}(\theta) \propto -\sum_m (y_{ij} \log \lambda_{ij} - \lambda_{i,j})$  and estimate the parameters  $\theta = \{\beta_0, \beta_c\}$  using iteratively  
106 reweighted least-squares. This provides a baseline null model, without a fast, synaptic effect. We then estimate  
107 the fast, synaptic effect using the full model  $\lambda_{ij} = \exp(\beta_0 + X_c\beta_c + w_{ij} \alpha(\tau, \Delta t))$ . Here we fit the model in two  
108 stages: 1) an initial fit that does not constrain the synaptic latencies, and 2) a subsequent fit that does. Using the  
109 estimated synaptic latency from the initial fit, we estimate the linear relationship between the distance and the  
110 synaptic latency. This enables us to use the estimated relationship to constrain the synaptic latency in the  
111 subsequent fit.

113 In stage 1, we fit the cross-correlogram  $y_{ij}$  optimizing the penalized negative Poisson log-likelihood:  $l_{full\_1}(\theta) \propto$   
114  $-\sum_m(y_{ij} \log \lambda_{ij} - \lambda_{ij}) + \eta_w \|w_{ij}\|_2 + \eta_\tau \|\tau_{ij} - \tau_0\|_2$ . This function is not convex due to the structure of the alpha  
115 function. However, we optimize the penalized log-likelihood using a non-linear conjugate gradient descent  
116 algorithm, and we use random restarts (50) in order to reduce the chances of getting stuck in local minima. Here  
117  $\eta_w$  and  $\eta_\tau$  are regularization hyperparameters that penalize large weights  $w_{ij}$  and differences between the time  
118 constant  $\tau_{ij}$  from a reference  $\tau_0$ , respectively. Using the estimated latency  $\Delta t_{ij}$  from the initial fit and the distance  
119 between the neurons, we then estimate a “conduction” velocity  $v_i$  and synaptic delay  $dt_i$  for the presynaptic  
120 neuron  $i$  (see below).

121  
122 In stage 2, using the estimated  $v_i$  and  $dt_i$ , we fit the cross-correlogram with an additional constraint on synaptic  
123 latency. Here we optimize the penalized negative Poisson log-likelihood:

$$124 \quad l_{full\_2}(\theta) = -\sum_m(y_{ij} \log \lambda_{ij} - \lambda_{ij}) + \eta_w \|w_{ij}\|_2 + \eta_\tau \|\tau_{ij} - \tau_0\|_2 + \eta_{\Delta t, i} \left\| \Delta t_{ij} - \left( \frac{1}{v_i} d_{ij} + dt_i \right) \right\|_2.$$

125 Adding the convex L2 penalty terms does not change the overall convexity of the function. Since the log-  
126 likelihood itself is not convex, here we again use a non-linear conjugate gradient descent algorithm with random  
127 restarts.  $\eta_w$  and  $\eta_\tau$  are hyperparameters constraining the weight and time constant, as before. Given the  
128 distance between the two neurons  $d_{ij}$ , the additional hyperparameter  $\eta_{\Delta t, i}$  controls how strictly the synaptic  
129 latency  $\Delta t_{ij}$  should be tied to the predicted linear distance-latency relationship. Here  $\eta_{\Delta t, i}$  is set based on the  
130 estimation of conduction velocity (see below,  $\eta_{\Delta t, i} = 2/\hat{\sigma}$  for the MEA data,  $\eta_{\Delta t, i} = 10/\hat{\sigma}$  for the simulations).

131  
132 In both stages,  $w_{ij}, \tau_{ij}, \Delta t_{ij}$  are log transformed so that they are strictly positive during the optimization (or, with  
133 a sign change, strictly negative when modeling an inhibitory  $w_{ij}$ ). In the results shown here we set  $\eta_w = 5$  and  
134  $\eta_\tau = 20$  through manual selection, and  $\tau_0$  is set to 0.8 ms. After fitting, we compare the performance of the full  
135 model with the slow model by calculating the log likelihood ratio of the two models  $LLR = l_{full\_2}(\theta) - l_{slow}(\theta)$ .  
136 If the log likelihood ratio exceeds a certain threshold, we conclude that there is a putative connection from  
137 neuron  $i$  to neuron  $j$ .

### 138 139 **Generating basis functions to describe the slow effect**

140 To capture the slow fluctuations in correlograms, we use low-rank nonlinear matrix factorization to learn a set of  
141 smooth basis functions  $X_c$ . Here we aim to reconstruct all of the correlograms in a given multielectrode recording  
142 using a generalized bilinear model:

$$143 \quad \Lambda = \exp(\mu x_0 + AX_c)$$

144 where  $\Lambda$  is a reconstruction matrix that aims to model the observed correlograms in terms of a vector of baseline  
145 correlations  $\mu$ , a matrix of weights  $A$ , and the smooth basis functions  $X_c$ . Note that here we model all  $p$   
146 correlograms in the dataset simultaneously ( $p = c(c-1)/2$  if there are  $c$  neurons). To ensure that  $X_c$  is smooth  
147 we further decompose this matrix as  $X_c = BX_S$  where  $X_S$  is a set of cubic B-spline curves with equally spaced  
148 knots. Altogether, the matrix of correlograms is reconstructed using the parameters  $\mu$ ,  $A$  and  $B$ .  $A$  is a  $p \times n_\beta$

149 matrix, where  $n_\beta$  is the number of basis functions that we aim to learn from the dataset (here set to 6).  $B$  is a  
150  $n_\beta \times n_s$  matrix, where  $n_s$  is the number of spline curves (here set to 16). And  $\mu$  is a vector that describes the  
151 baseline correlation for each correlogram, and that is multiplied by a row vector of ones  $x_0$ . In order to estimate  
152 the parameters we use an alternating gradient descent algorithm to approximately maximize the overall log-  
153 likelihood  $\sum_{ij} \sum_m (y_{ij} \log \Lambda_{ij} - \Lambda_{ij})$ . We alternate between updating the fits to each correlogram ( $\mu$  and  $A$ ) given  
154 a fixed set of bases ( $B$ ) and updating the bases ( $B$ ) given a fixed description of the individual correlograms ( $M$   
155 and  $A$ ). Finally, we generate the basis functions as  $X_c = BX_s$ .

156  
157 Although some pairs of neurons may have fast synaptic effects in addition to slower fluctuations due to common  
158 input, the proportion of these pairs is expected to be small (less than ~5%). Since these connected pairs also  
159 have different weights, latencies, and time constants, the overall effect on the shapes of the learned bases  $X_c$   
160 should be relatively small.

### 161 162 **Structural constraints on fast, synaptic effects**

163 While learned bases capture slow structure in the cross-correlograms across all pairs, we also aim to describe  
164 structure in the fast, synaptic effects for each presynaptic neuron. In the full model, we include two structural  
165 constraints: 1) we constrain the latency of synaptic connections to increase with increasing distance between  
166 neurons, and 2) we constrain presynaptic neurons to either excite or inhibit all of their postsynaptic targets, in  
167 accordance with Dale's law. Together, these constraints have the potential to improve detection of weak  
168 connections that are consistent with the constraints and rule out the false positives that are inconsistent.

### 169 170 **Estimation of the "conduction velocity"**

171 To implement the constraint that synaptic latencies should increase with distance, we estimate an approximate  
172 "conduction velocity" for each presynaptic neuron based on the distances between neurons and the estimated  
173 synaptic latencies from stage 1 above. Physiologically, conduction velocities vary as a function of axon diameter  
174 and myelination (Sakaguchi et al. 1993) so some differences are perhaps expected. However, that in most  
175 extracellular applications we are estimating the soma locations based on uncertain waveform information, and  
176 the locations of axons and dendrites are unknown. "Conduction velocity" is, thus, just an approximation of the  
177 potential positive relationship between synaptic latency and the distance.

178  
179 Here we assume that there is a linear relationship between the synaptic latencies and the distances between  
180 the estimated somatic location of a presynaptic neuron  $i$  and postsynaptic neuron  $j$ ,

$$181 \quad \Delta t_{ij} = \frac{1}{v_i} d_{ij} + dt_i$$

182 where  $\Delta t_{ij}$  is the synaptic latency,  $d_{ij}$  is the distance between neurons, and the parameters  $v_i$  and  $dt_i$  describe  
183 the "conduction velocity" and "synaptic delay" of the presynaptic neuron. To estimate the parameters, we first fit  
184 all possible connections from the presynaptic neuron. Using initial estimates of  $\widehat{\Delta t}_{ij}$  from the full model (stage 1),

we then estimate  $v_i$  and  $dt_i$  for the neuron using a penalized weighted linear regression with the inter-neuronal distances as predictors. Namely, we minimize the penalized, weighted negative log-likelihood  $l(v_i, dt_i) \propto \Sigma(\Delta t_{ij} - \widehat{\Delta t}_{ij})^2 w_v^{ij} / \Sigma w_v^{ij} + \eta_{dt} \|dt_i\|_2$ , where the penalty  $\|dt_i\|_2$  ensures that  $dt_i$  close to zero, and  $\eta_{dt}$  is a hyperparameter, which we set to 5 based on manual search. The weights  $w_v^{ij}$  are set by ranking each pair of neurons based on the likelihood ratio between the slow model and full model ( $l_{full_1} - l_{slow}$ , see **Parameter Estimation**), with the  $r$ th ranked pair having  $w(r) = \frac{1}{1+e^{2(r-5)}}$ . This allows the pairs that are more likely to be true connections (those with larger likelihood ratios) to have larger weights. Then, after conducting the penalized weighted linear regression, we pick the 5 neuron pairs with the largest weights to estimate the mean squared prediction error  $\hat{\sigma}_i^2 = \frac{1}{5} \Sigma(\Delta t_{ij} - \widehat{\Delta t}_{ij})^2$ , which measures the reliability of the estimation. This estimated prediction error, along with the estimated conduction velocity  $v_i$  and delay  $dt_i$ , is then used to constrain the penalized full model in stage 2 (see **Parameter Estimation** above).

### Estimation of the presynaptic neuron type

According to Dale's Law, a single neuron should rarely be both excitatory and inhibitory, and connections with the same presynaptic neuron are most likely to be all excitatory or all inhibitory. In order to estimate the presynaptic neuron type, for each presynaptic neuron  $i$ , we fit all the cross-correlograms  $y_{i1}, y_{i2}, \dots, y_{in}$  using full model twice, once constraining  $w_{ij} \geq 0$  (excitatory model) and once constraining  $w_{ij} \leq 0$  (inhibitory model). Here we determine the presynaptic neuron type using the log likelihood ratio of the excitatory model fit to the inhibitory model fit.

$$LLR_{\pm} = (y_{ij} \log \lambda_{ij}^+ - \lambda_{ij}^+) - (y_{ij} \log \lambda_{ij}^- - \lambda_{ij}^-)$$

If the log likelihood ratio is positive, this suggests that the excitatory model provides a better description of the correlogram than the inhibitory model. For each presynaptic neuron, we use the single neuron pair with the largest likelihood ratio between two models to classify the neuron type (we tried using several weighting schemes, such as the average  $LLR$  across all pairs or the top-N pairs, but for the simulations and datasets used here the top-1 pair performed well). We classify the presynaptic neuron  $i$  as a putative excitatory neuron if  $LLR_{\pm} > 0$ , or as a putative inhibitory neuron if  $LLR_{\pm} < 0$ . After the neuron type classification, we only adopt the corresponding full model (excitatory/inhibitory model based on the presynaptic neuron type) to later determine whether there is a putative synaptic connection. We label all the putative connections from an excitatory presynaptic neuron as putative excitatory connection, and all the putative connections from an inhibitory presynaptic neuron as putative inhibitory connections.

### Simulated networks of synaptically connected neurons

To examine how our model-based synapse detection approach performs we build two simulated networks of modified leaky integrate-and-fire (LIF) neurons. In real data, the shapes of cross-correlograms of two neurons can be affected by both the background activity of the network (external input shared by the network), and the patterns of presynaptic activity (e.g. high vs low firing rate, bursting). Here we designed two distinct simulations



to capture these effects. In a first simulation we model a network of recurrently connected neurons that all receive background common input, creating slow fluctuations in the cross-correlograms similar to those observed in real data. In a second simulation we then model a set of neurons receiving presynaptic inputs from experimentally observed spikes, creating presynaptic spike patterns similar to those present in real data (Simulation 2 with real presynaptic inputs).

For Simulation 1 with common input, we build a simplified, simulated network of adaptive leaky integrate-and-fire neurons with current-based synaptic inputs. 300 neurons are included in the simulation – 50% excitatory, 50% inhibitory. All the neurons are randomly distributed in a square area. The neurons are randomly connected, and only the neuron pairs whose distances are less than the median distance have synaptic connections. The connection probability is set to be 5%. 60 minutes of current input and voltage recording for each neuron are simulated with a simulated sampling rate 10kHz for this network. The mean firing rate of all the neurons is 3.5Hz. In this modified LIF model (based on (Liu and Wang 2001)), the membrane potential dynamics are affected by three currents: 1) a leak current, 2) an after-hyperpolarization current, and 3) synaptic input

$$C_m \frac{dV_m}{dt} = -g_{leak}(V_m - V_{rest}) - g_{AHP}[Ca^{2+}](V_m - V_{AHP}) + I_{input}$$

with

$$\frac{d[Ca^{2+}]}{dt} = -\frac{[Ca^{2+}]}{\tau_{Ca}}$$

and if  $V_m(t) = V_{th}$  the neuron resets with

$$V_m \rightarrow V_{rest}, [Ca^{2+}] = [Ca^{2+}] + a.$$

Here the dynamics of the membrane potential  $V_m$  are governed by leaky integration of the input current, but every time the neuron spikes Ca-currents lead to an after-hyperpolarization, preventing the neuron from spiking rapidly. In the modified LIF model, when the membrane potential  $V_m$  reaches the threshold  $V_{th}$ , the neuron spikes,  $V_m$  is reset to  $V_{rest}$ , and  $[Ca^{2+}]$  increases by the amount  $a$ .

The input current  $I_{input}$  to each postsynaptic neuron is given by

$$I_{input}(t) = (1 - w_{com})I_{spontaneous}(t) + w_{com}I_{com}(t - \Delta t_{com}) + \sum_i I_{syn,i}(t).$$

where  $I_{spontaneous}$  is  $1/f$  noise independently generated for each neuron,  $I_{com}$  is  $1/f$  noise shared by the whole network. Each neuron receives the common input with random latencies  $\Delta t_{com}$  to simulate the slow fluctuation caused by background common input, and  $w_{com}$  is the random common input weight.  $I_{syn,i}$  denotes the synaptic current from the  $i$ th presynaptic input added to the postsynaptic neuron with a synaptic latency  $\Delta t_{ij}$  after each presynaptic spike at  $t_s$ ,  $I_{syn,i}(t) = w_{syn,i} \sum_{t_s < t} \frac{t - t_s - \Delta t_{ij}}{\tau_{syn}} e^{1 - (t - t_s - \Delta t_{ij})/\tau_{syn}}$ .  $w_{syn,i}$  is the synaptic weight randomly drawn from a bounded log-normal distribution – positive when the connection is excitatory and negative when the connection is inhibitory. Note that, since  $\max\left(\frac{t}{\tau} e^{1 - \frac{t}{\tau}}\right) = 1$ ,  $w_{syn}$  sets the amplitude of individual Post synaptic

current (PSC) in units of nA. Here we also give each presynaptic neuron a random “conduction velocity”  $v_i$  and set the synaptic latency according to  $\Delta t_{ij} = d_{ij}/v_{ij}$ . This simulated network, thus, obeys the rule that synaptic latencies increase linearly with the distances between presynaptic neuron and postsynaptic neuron (see Table 1 for parameters).

In Simulation 2 with real presynaptic inputs, we model 300 adaptive leaky integrate-and-fire neurons that receive input from 300 neurons whose spike trains are from an *in vitro* multielectrode array recording. We randomly assign half of the 300 presynaptic neurons to be excitatory neurons and half to be inhibitory. The connection probability, connection rules, and LIF parameters are the same as in the first simulation (see Table 1). Here the simulated sampling rate is 20Hz, which was used in the *in vitro* recording, and the input currents do not contain the background common input,  $I_{input}(t) = I_{spontaneous}(t) + \sum_i w_{syn,i} I_{syn,i}(t)$ .

| <b>Membrane properties</b>                                                                |                                                           |                                                                                                  |                                                 |
|-------------------------------------------------------------------------------------------|-----------------------------------------------------------|--------------------------------------------------------------------------------------------------|-------------------------------------------------|
| membrane capacity<br>$C_m = 1000$ pF                                                      | membrane conductance<br>$g_{leak} = .1$ $\mu$ S           | resting potential<br>$V_{rest} = -65$ mV                                                         | action potential threshold<br>$V_{th} = -50$ mV |
| <b>After-hyperpolarization (AHP) adaption</b>                                             |                                                           |                                                                                                  |                                                 |
| AHP conductance<br>$g_{AHP} = 1$ $\mu$ S                                                  | AHP potential<br>$V_{AHP} = -80$ mV                       | AHP time constant<br>$\tau_{ca} = 10$ ms                                                         | influx<br>$\alpha = .2$ $\mu$ M                 |
| <b>Synaptic input current</b>                                                             |                                                           |                                                                                                  |                                                 |
| conduction velocity*<br>Sim1: $v_i \sim U(.6, 2.1)$ AU/s<br>Sim2: $v_i \sim U(1, 3)$ AU/s | synaptic time constant<br>$\tau_{syn} = 1$ ms             | synaptic weight (PSC amplitude)<br>$ w_{syn}  \sim \text{lognormal}(-1.8, .25) \in [.05, .5]$ nA |                                                 |
| <b>Common input current</b>                                                               |                                                           |                                                                                                  |                                                 |
| common input weight<br>$w_{com} = .5$                                                     | common input latency<br>$\Delta t_{com} \sim U(0, 50)$ ms |                                                                                                  |                                                 |

Table 1: Parameters in the two simulated networks

\*Since we don't specify the “area” of the square space, the unit of the velocity is in arbitrary units (AU/s).

### Synaptic detection based on hypothesis testing

In addition to our model-based synapse detection method we also examine two previous methods based on hypothesis testing: a thresholding method and a spike jitter method.

The thresholding method detects synapses by testing if the peak or trough in the correlogram is significantly different from the expected number of coincidences (Barthó et al. 2004; Perkel et al. 1967b). Here we model the count distribution using the mean  $\bar{y}_{ij}$  and standard deviation  $s_{ij}$  of the cross-correlogram across bins – here between  $[-25, 25]$  ms, excluding the bins within the interval of  $[-10, 10]$  ms. We then compute the z-score  $z_{ij}^k =$



278  $(y_{ij}^k - \bar{y}_{ij})/s_{ij}$  for each bin  $k$  and compare this to a critical value  $z_c$ . If there is at least one bin within the interval  
279 of interest that exceeds the upper threshold  $z_c$ , the connection from neuron  $i$  to neuron  $j$  is labeled as an excitatory  
280 connection. Similarly, if there is at least one bin within the interval below the lower threshold  $-z_c$ , the connection  
281 from neuron  $i$  to neuron  $j$  is labeled as an inhibitory connection. In practice, the threshold  $z_c$  can be adjusted to  
282 optimize the number of false positives/negatives. In comparing models, we use ROC curves to examine all  
283 thresholds (see below).

284  
285 One potential problem with the thresholding method is that the baseline for a correlogram is often not constant.  
286 To address this, an alternative method (Fujisawa et al. 2008; Hatsopoulos et al. 2003) uses jittered spike trains  
287 to generate a baseline cross-correlogram that keeps the shape of the slow fluctuation while removing fast  
288 synaptic effects. With the jitter method, the presence of synaptic connections can then be inferred by testing if  
289 there is a peak or trough that is significantly different from this time-varying baseline. Here we use a variant of  
290 this method where, for each neuron, we randomly and independently jitter each spike on a uniform interval of [-  
291 5,5] ms (as in Fujisawa et al. 2008) and generate 1000 jittered spike trains. The baseline cross-correlogram  
292 between neurons  $i$  and  $j$  is then defined as the mean of the 1000 cross-correlograms constructed using the  
293 original spike trains of neuron  $i$  and the 1000 jittered spike trains of neuron  $j$ . We calculate the mean  $\bar{y}_{ij}$  and  
294 standard deviation  $s_{ij}$  of the 1000 cross-correlograms for each neuron pair. We then compute the z-score of  
295 each bin based on the original correlogram  $z_{ij}^k = (y_{ij}^k - \bar{y}_{ij}^k)/s_{ij}^k$ . As in the threshold method, if at least one of the  
296 bins within the interval of [0,10] ms exceeds the upper threshold  $z_c$ , the connection is labeled as excitatory.  
297 Similarly, if there is at least one bin within the interval below the lower threshold  $-z_c$ , the connection is labeled  
298 inhibitory.

## 300 **Evaluating methods for synapse detection**

301 Using the simulations described above we evaluate our model-based synapse detection method alongside the  
302 thresholding method and jitter method. Benchmarking the performance of synapse detection methods on real  
303 extracellular recordings is difficult, since we are almost always uncertain about whether or not two neurons are  
304 monosynaptically connected. However, with simulations, the ground-truth connectivity is known, and we can  
305 compare the detection accuracy for different methods. Here we use receiver operating characteristic (ROC)  
306 curves, specifically comparing false positive and true positive rates. Since the number of true positives is small  
307 (less than ~5%), these rates and the area under the ROC curve (AUC) give a more accurate impression of the  
308 detection performance than the overall accuracy and can be calculated without a set threshold. The scores we  
309 use to determine whether there is a synaptic connection in generating the ROC curves vary for the three methods.  
310 For the model-based method developed here, we use the log likelihood ratios of full model to slow model, while  
311 for thresholding and jitter methods, we use the largest z-score within the [0,10] ms interval.

312  
313 The ROC curves measure the overall performance of different methods on a series of thresholds. But when we  
314 apply the method to real data and plan to make decisions on synapse detection, we still need to specify a

315 threshold. The choice of threshold has a large effect on the detection of putative synaptic connections. A  
316 threshold that is too strict will result in a large number of false negatives, while a threshold that is not strict enough  
317 will result in a large number of false positives. The uncertainty and diversity of the real datasets make it difficult  
318 to pick the optimal threshold. Here, for illustration, we pick the threshold based on the results in our simulated  
319 network (we pick Simulation 1 here since the threshold based on Simulation 1 is stricter). Since synaptic  
320 connections are relatively rare compared to the total number of neuron pairs, we use Matthews correlation  
321 coefficient (MCC, Matthews 1975) to measure the performance of different thresholds, which performs well for  
322 imbalanced data (Boughorbel et al. 2017):

$$323 \quad MCC = \frac{TP \times TN - FP \times FN}{\sqrt{(TP + FP)(TP + FN)(TN + FP)(TN + FN)}},$$

324 where  $TP$  is the number of true positives,  $TN$  is the number of true negatives,  $FP$  is the number of false  
325 negatives, and  $FN$  is the number of false negatives. For the model-based method, the maximum MCC is .81  
326 (TPR = 73.46%, FPR = 0.33%) for Simulation 1, the corresponding threshold is 5.09 (log likelihood ratio). It may  
327 be valuable to note that this threshold is relatively close to the decision rule that would be given by minimizing  
328 the Akaike or Bayesian Information Criteria (AIC or BIC), where the log likelihood ratios would need to be greater  
329 than 3 or  $\sim 6.9$ , respectively (based on  $k = 3$  extra parameters and  $n = 100$  bins of observations). For jitter  
330 method, the maximum MCC is .63 (TPR = 49.99%, FPR = 0.58%), the corresponding threshold is 3.92 (z-score)  
331 for Simulation 1. In comparing the results from different synapse detection methods with real data, we pick the  
332 thresholds for our method and the jitter method based on these maximum MCC results from the simulation.

333  
334 In addition to the choice of threshold, the jitter method has 1 hyperparameter (jitter interval) and the model-based  
335 method has 7 ( $\eta_w, \eta_\tau, \tau_0, \eta_{\Delta t, i}, \eta_{dt}, n_\beta, n_s$ ) that are used for the entire set of putative connections. Here we fix the  
336 hyperparameters for the model-based approach based on a coarse, manual optimization that minimizes false  
337 positive fits with unlikely latencies ( $\Delta t$ ) and time constants ( $\tau$ ). These values could also potentially be optimized  
338 using the cross-validated likelihood but, in practice, the results are robust across a wide range of settings.

## 339 340 **MEA data**

341 To examine how these methods detect putative synaptic connections in experimental data we use *in vitro*  
342 recordings of spontaneous activity from organotypic slice cultures of mouse somatosensory cortex made using  
343 a large and dense multielectrode array (512 electrodes, 60  $\mu\text{m}$  interelectrode spacing, 5  $\mu\text{m}$  electrode diameter,  
344 flat electrodes, roughly 1 mm by 2 mm total array area). The extracellular signals were recorded for 60 minutes  
345 at 20 kHz, and the spiking activity was then spike sorted based on the waveforms of the marked electrode and  
346 its six adjacent neighbors using principal component analysis (PCA). The location of each neuron was estimated  
347 using a 2D Gaussian fit to the maximum values of the spike triggered average waveforms across multiple  
348 electrodes. There are 25 datasets available, most of which possess hundreds of neurons (min: 98, max: 594,  
349 mean: 309, total: 7735, mean firing rate of the neurons: 2.1 Hz). All data is available via the Collaborative  
350 Research in Computational Neuroscience (CRNCS) Data Sharing Initiative: [https://crcns.org/data-sets/ssc/ssc-](https://crcns.org/data-sets/ssc/ssc-3/about-ssc-3)  
351 [3/about-ssc-3](https://crcns.org/data-sets/ssc/ssc-3/about-ssc-3). Additional experimental details can be found in (Ito et al. 2014).

352

353 To simulate the network with real data input (Simulation 2), we used spike trains from the highest firing rate  
354 neurons combined from two datasets (datasets 16 and 23), choosing 300 neurons in total (out of 904 possible).  
355 The mean firing rate of the 300 neurons was 5.57Hz (min: 1.88Hz, max: 44.55Hz).

356

357 For examining putative synaptic connectivity in the experimental data, we use dataset #13 (number of neurons:  
358 381, mean firing rate: 1.95 Hz) and dataset #23 (number of neurons: 310, mean firing rate: 2.81 Hz). Here we  
359 exclude the neurons with less than 1000 spikes recorded, 68 neurons (17.85%) are excluded from dataset #13,  
360 21 neurons (6.77%) are excluded from dataset #23. Before we apply the detection methods on these datasets,  
361 we also exclude the neuron pairs where the correlogram may be misestimated due to the way that spike trains  
362 were sorted. If the waveforms of two neurons show up on the same set of electrodes, near simultaneous spikes  
363 tend to overlap and be sorted inaccurately (Pillow et al. 2013, "spike shadowing"). Here, we calculate a spike  
364 sorting index  $ss = \min \left\{ \frac{\mu_c - \mu_l}{\mu_l}, \frac{\mu_c - \mu_r}{\mu_r} \right\}$  to exclude the cross-correlograms with a peak or trough near  $m = 0$ . Here  
365  $\mu_c$  is the total number of counts within 1.5 ms of the center of the correlogram (3 bins),  $\mu_l$  is the total number of  
366 counts within 1.5 ms (3 bins) that are to the left of the center,  $\mu_r$  is the total number of counts within 1.5 ms (3  
367 bins) that are to the right of the center. We exclude the neuron pairs when the spike sorting index  $ss$  is greater  
368 than 0.5. Based on this rule, 6.51% of the neuron pairs are excluded from dataset #13, 5.55% of the neuron  
369 pairs are excluded from dataset #23.

370

## 371 Results

372 Here we develop an extension of a generalized linear model (GLM) to describe the correlograms between pairs  
373 of neurons. This model aims to separate the cross-correlogram between each pair of neurons into two parts: 1)  
374 a slow effect caused by fluctuating firing rates and common input from other neurons, which is fit using a group  
375 of smooth basis functions learned from the data, and 2) a fast effect caused by the synaptic connection, which  
376 is fit by a short-latency, fast onset alpha function (Fig. 1A). In this study, we model the time interval between -25  
377 ms to 25 ms, with a binsize of 0.5 ms. To determine whether or not a given pair of neurons might be synaptically  
378 connected we then compare the full model with a reduced model that has the slow effect but not the fast effect.  
379 If the full model provides a better description of the data than the slow model (using log-likelihood ratio), this may  
380 indicate that there is a synaptic connection between the two neurons (Fig. 1B).

381

382 Although this model comparison based on the correlogram between a single isolated pair of neurons can provide  
383 evidence of a putative synaptic connection, incorporating information from other connections may be able to  
384 improve detection accuracy. Here we first constrain the parameters of the full model based on the presynaptic  
385 neuron type. Since neurons are rarely both excitatory and inhibitory (Dale's Law), synaptic connections with the  
386 same presynaptic neuron are most likely to be all of one sign. If a presynaptic neuron has a connection with a  
387 clear positive synaptic effect, this can indicate that other connections from this presynaptic neuron should be  
388 positive as well. Second, we constrain the parameters of the full model based on the synaptic latency. Synaptic

389 latencies tend to increase with the distance between the pre- and postsynaptic neuron (Fig. 1C). Here we assume  
 390 a linear relationship between distance and latency and estimate a “conduction velocity” for each presynaptic  
 391 neuron. If this relationship is clearly linear, the possible latencies for other connections can be constrained.  
 392 Together, these two constraints may act to better detect the weak connections and exclude the false positives  
 393 that violate the expected structure (see more details in methods).  
 394

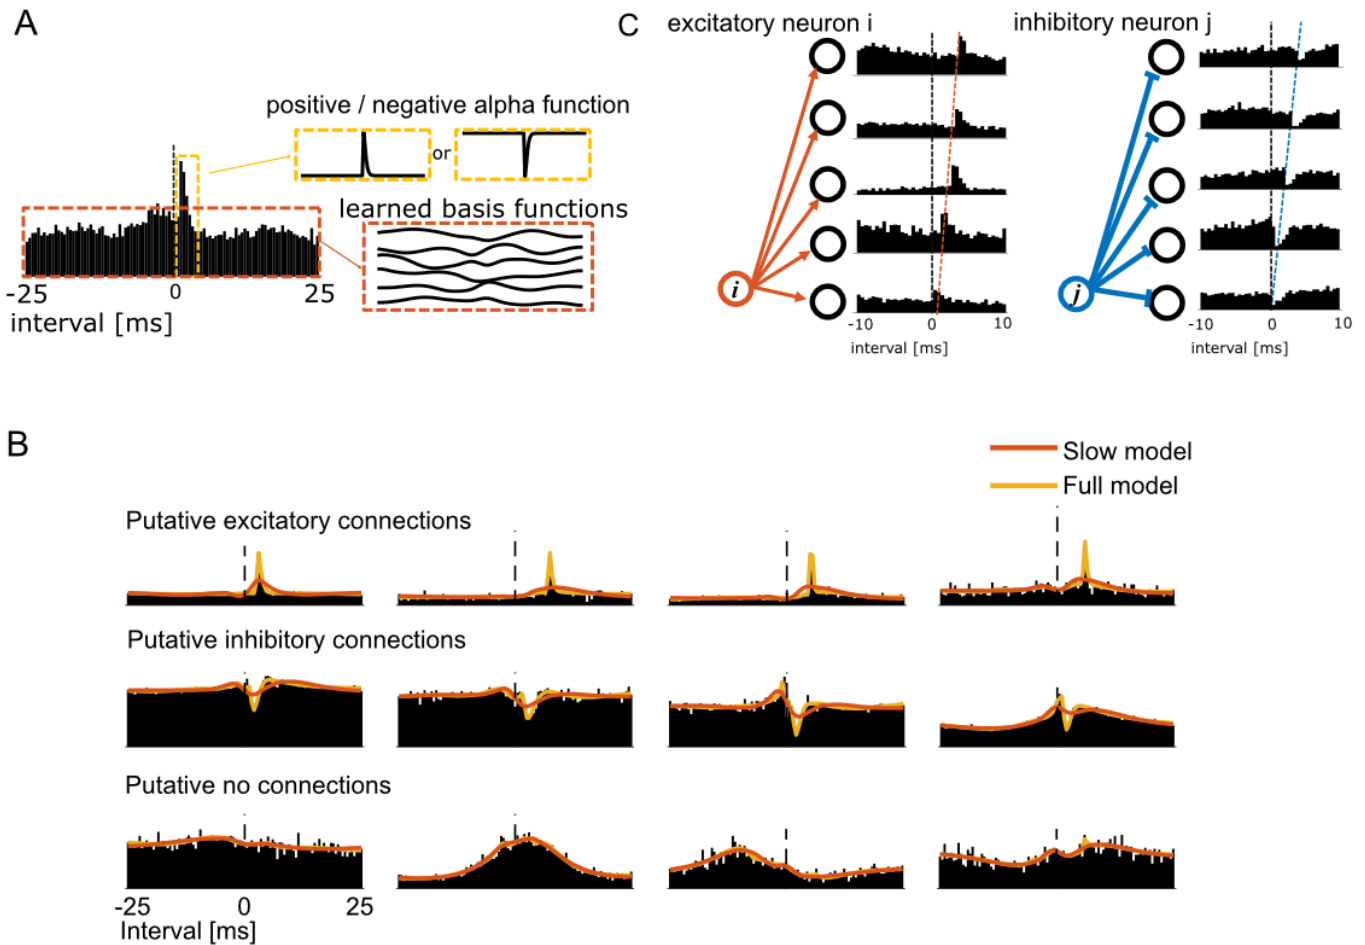

395

396

397

398

399

400

401

402

403

404

405

406

407

408

409

Figure 1: Model-based description of the cross-correlogram between the spiking of a pair of potentially connected neurons. A: The extended GLM separates the cross-correlogram into two parts: 1) a slow effect that we fit using a group of smooth basis functions which were learned from the whole network (outlined in red), and 2) a fast effect that we fit using a short-latency, fast onset alpha function (outlined in yellow). B: Some examples of model fits for cross-correlograms of putative excitatory, putative inhibitory, and putative non-connections. If the full model (yellow) provides a better fit to the correlogram than the slow model (red), we label the neuron pair as a putative connection. C: The schematic figure shows the structural information that we use to constrain the model fits: 1) the connections from one presynaptic neuron should be either all excitatory or inhibitory, and 2) the synaptic latency should increase with increasing distance between pre- and postsynaptic neurons.

### Simulated networks with type and latency constraints

To evaluate our model, we build two simulated networks of adaptive leaky integrate-and-fire (LIF) neurons: Simulation 1 with common inputs, a network of 300 recurrently connected LIF neurons receiving slow, background common input, and Simulation 2 with real presynaptic inputs, a network of 300 unconnected LIF neurons receiving input from a set of experimentally recorded spike trains. In the first simulation, the neurons

410 are randomly connected to each other with a connection probability of 5% (~15 connections per presynaptic  
411 neuron). Half of the neurons are randomly assigned to be excitatory, with the other half being inhibitory. Synaptic  
412 weights (as PSC amplitude) are then randomly drawn from a log-normal distribution, similar to results from *in*  
413 *vitro* observations (Song et al. 2005). In addition to the synaptic input, all neurons receive background common  
414 input from a single slowly fluctuating, noisy source with a random delay (see Methods). This common input  
415 produces baseline fluctuations in the cross-correlograms similar to what is frequently observed in the real data  
416 (Fig 2A). Additionally, we assign each presynaptic neuron a “conduction velocity” and make the synaptic latencies  
417 between neurons distance-dependent. In Simulation 1, the mean firing rate of all the neurons is 3.56 Hz (min:  
418 1.84 Hz, Q1: 2.94Hz, Q2:3.44 Hz, Q3: 4.06 Hz, max: 7.83 Hz, SD = .90 Hz). This simulated network, thus, has  
419 realistic slow fluctuations in the correlograms, obeys Dale’s Law, and the relationship between synaptic latency  
420 and distance increases linearly for each presynaptic neuron.

421  
422 The second simulation consists of a set of 300 LIF neurons each receiving presynaptic inputs from a subset of  
423 300 spike trains recorded *in vitro*. Again, the presynaptic neurons are randomly connected to the postsynaptic  
424 neurons with a connection probability of 5%, presynaptic neurons are randomly assigned to be excitatory or  
425 inhibitory ( $p=0.5$ ), and the synaptic weights are randomly drawn from a log-normal distribution. The synaptic  
426 latencies also increase linearly with distance, as before. In this case, although there is no common input, the  
427 presynaptic spike patterns are drawn from experimental recordings and the presynaptic neurons have greater  
428 variation in their firings rates and inter-spike interval patterns. The mean firing rate of the presynaptic neurons in  
429 this simulation is 5.57 Hz (min: 1.88 Hz, Q1 = 2.84 Hz, Q2 = 4.26 Hz, Q3 = 6.55 Hz, max: 44.6 Hz, SD =4.98  
430 Hz). The mean firing rate of the postsynaptic, LIF neurons is 6.02 Hz (min: 4.13 Hz, Q1: 5.44 Hz, Q2:5.96 Hz,  
431 Q3: 6.54, max: 8.66 Hz, SD = .84 Hz). Although the correlograms of Simulation 2 do not have slow baseline  
432 fluctuations (Fig 2B), they have a broader range of absolute baselines and will allow us to determine to what  
433 extent synapse detection is affected by more realistic presynaptic spike patterns.

434

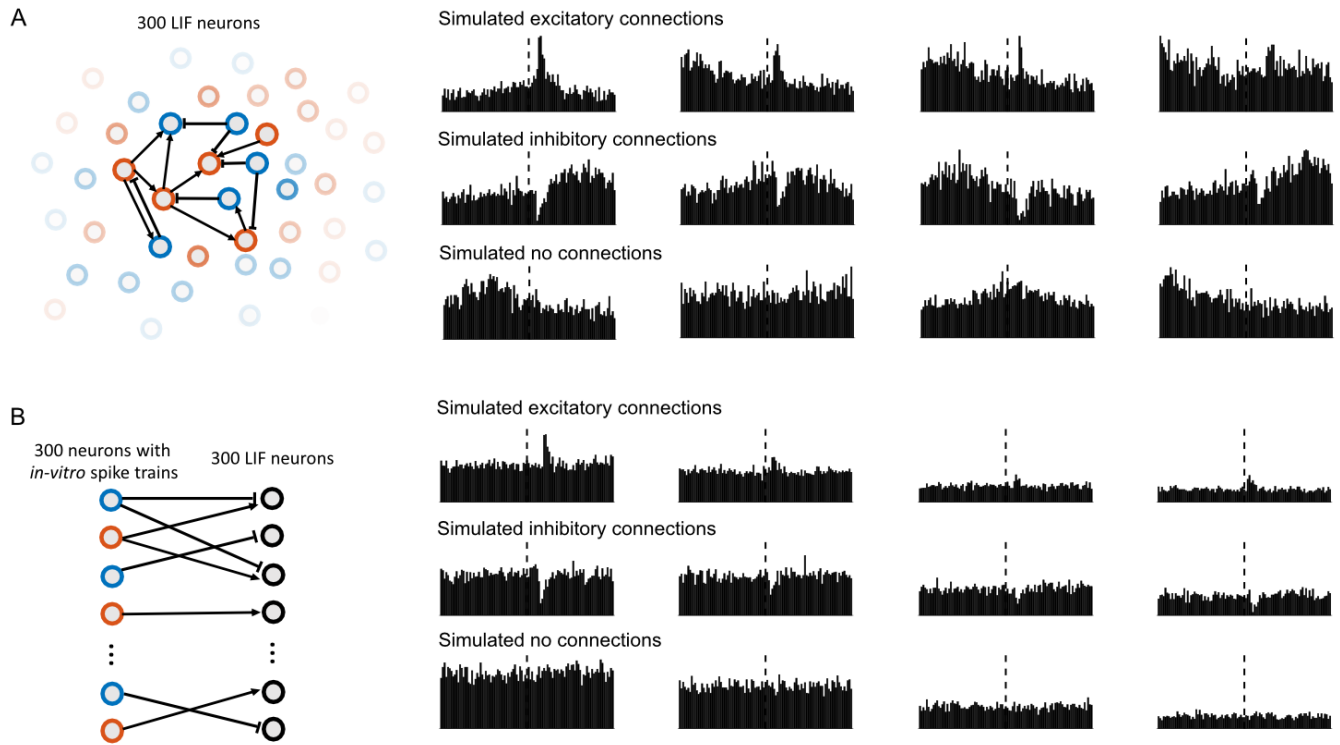

435

436

437

438

439

440

441

442

443

444

445

446

447

448

449

450

451

452

453

454

455

456

457

458

Figure 2: Two simulated networks of leaky integrate-and-fire (LIF) neurons. A: Schematic showing the structure of Simulation 1 with common inputs (left). 300 LIF neurons (50% excitatory, 50% inhibitory) are randomly connected to each other with constraints on synaptic latency (see Methods). They receive background common input to generate a slow baseline fluctuation in the cross-correlogram. Examples of the cross-correlograms for simulated excitatory, inhibitory and non-connections (right). B: Schematic showing the structure of Simulation 2 with real presynaptic inputs (left). 300 LIF neurons receive presynaptic inputs from 300 experimentally recorded spike trains. We randomly assign 50% of the presynaptic neurons to be excitatory and the other half to be inhibitory. Note that, although the schematic illustrates the bipartite connectivity structure, the 600 neurons are randomly distributed in space and the synaptic latencies increase linearly with distance between the neurons as in Simulation 1. Examples of the cross-correlograms of simulated excitatory, inhibitory, and non-connections from the second simulation (right). Due to the fact that the experimentally recorded spike trains have greater variation in the average firing rates and patterns, the cross-correlograms here have a wider range of absolute baselines.

A central assumption of the model-based detection approach used here is that neuron type and latency constraints can, in principle, allow information to be shared across the connections made by a presynaptic neuron. However, in order for these constraints to be useful, the model must be able to accurately estimate both whether a presynaptic neuron is excitatory or inhibitory and the presynaptic neuron's "conduction velocity" from noisy spiking data. Therefore, before evaluating whether these constraints improve detection, we determine how accurately we can recover neuron type and "conduction velocity" in each of the simulations.

In order to determine the presynaptic neuron type, we compare two models of the cross-correlogram between each pair of neurons: one with a positive fast, synaptic effect and the other with a negative synaptic effect. We can then estimate the type of each presynaptic neuron by asking which of the two models provides a better description of the cross-correlograms involving that presynaptic neuron (see Methods). Using our model, in Simulation 1 with common inputs, 99.7% of the neurons are labeled correctly (1 out of 300 mislabeled). In



459 Simulation 2 with real presynaptic inputs, 94.3% of the neurons are labeled correctly (17 out of 300 mislabeled).  
460 In this case the mislabeled neurons are also relatively low-firing rate (mean firing rate = 2.99 Hz, compared to  
461 5.57 Hz for all neurons).

462

463 We then evaluate how well we can estimate each presynaptic neuron's conduction velocity from the cross-  
464 correlograms. Here we estimate the synaptic latency between each pair of neurons and use a weighted linear  
465 regression to then estimate the "conduction velocity" of each presynaptic neuron (see Methods). Using this  
466 approach, we find that we can recover the true velocity that was assigned to each of the presynaptic neurons in  
467 the simulations relatively accurately. For Simulation 1 with common inputs, the estimated latency-distance  
468 parameters are correlated with their true values ( $\frac{1}{v_i}$ ),  $r = .93$ ,  $p < .01$ , root mean squared error  $RMSE =$   
469  $.0013\text{m/s}$  (Fig. 3A) and for Simulation 2 with real presynaptic inputs,  $r = .66$ ,  $p < .01$ ,  $RMSE = .0016\text{ m/s}$  (Fig.  
470 3D).

471

472 Given these constraints, we can then examine how well we are able to recover the properties of individual  
473 connections. Here we analyze only the true connections within the simulations and find that the true synaptic  
474 weight can be recovered relatively accurately: for Simulation 1 with common inputs,  $r = .97$ ,  $p < .01$ , for  
475 Simulation 2 with real presynaptic inputs,  $r = .88$ ,  $p < .01$ . Similarly, synaptic latency can be estimated  
476 accurately: for the simulation with common inputs,  $r = .98$ ,  $p < .01$ ,  $RMSE = .34\text{ ms}$  for the simulation with  
477 common inputs,  $r = .89$ ,  $p < .01$ ,  $RMSE = .66\text{ ms}$ . And Including neuron type and latency constraints improves  
478 those reconstructions (For the model without constraints, Simulation 1: latency:  $r = .57$ ,  $p < .01$ ,  $RMSE = 1.84$   
479  $\text{ms}$ , weight:  $r = .93$ ,  $p < .01$ . Simulation 2: latency:  $r = .37$ ,  $p < .01$ ,  $RMSE = 2.17\text{ ms}$ , weight:  $r = .76$ ,  $p <$   
480  $.01$ ). Together, these results illustrate how, for simulated networks, our model is able to capture the type and  
481 conduction velocity of presynaptic neurons, as well as the parameters of individual connections.

482

Simulation 1 with recurrent connections and background common inputs:

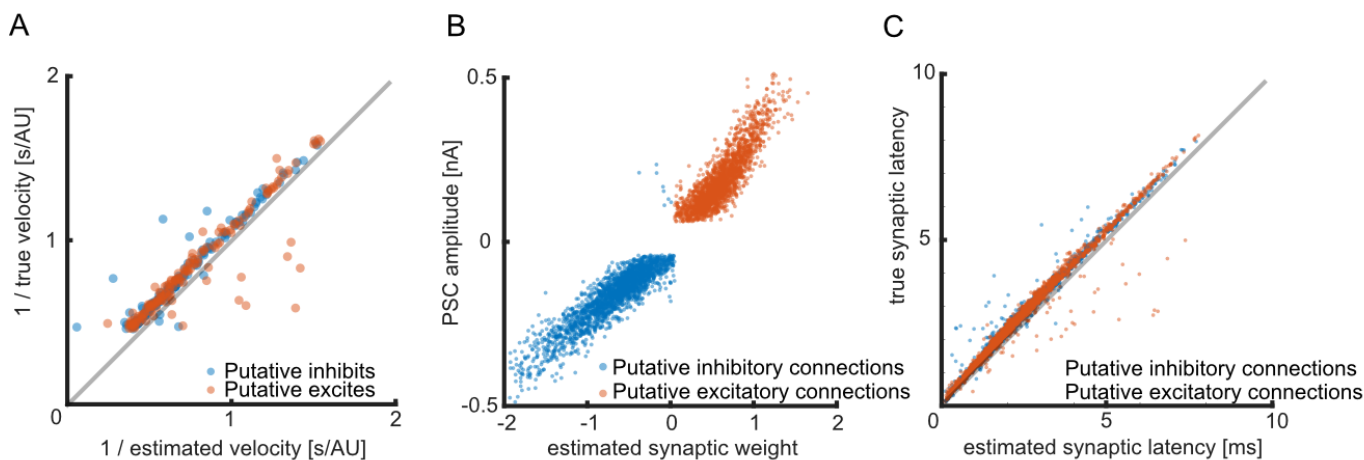

Simulation 2 with *in-vitro* spike recording serving as presynaptic inputs:

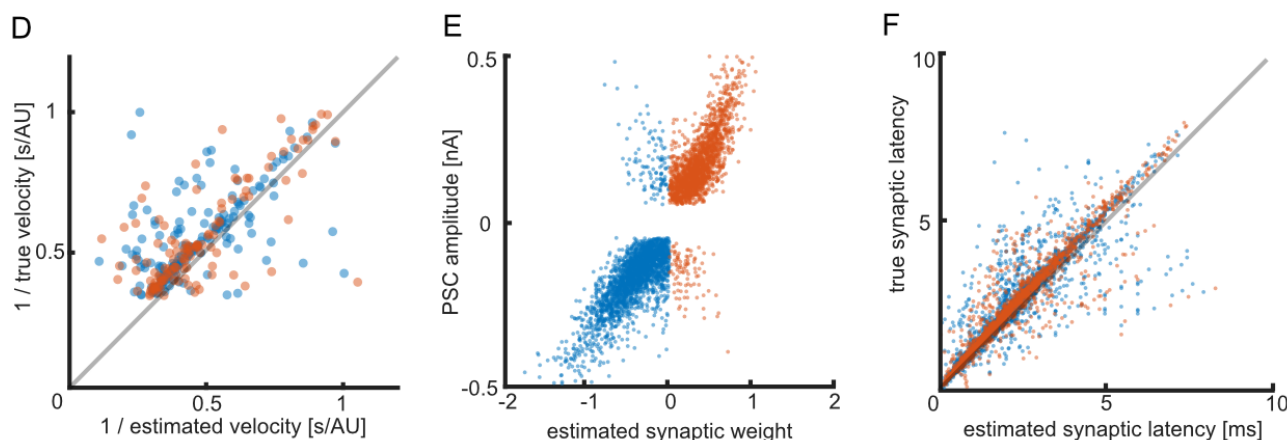

483

484

485

486

487

488

489

490

491

492

### Synapse detection with simulated spike trains: Evaluating the model-based method

493

494

495

496

497

498

499

500

501

Given that the model-based approach can recover the properties of presynaptic neurons (type and conduction velocity) and the properties of individual connections, we then ask how well our model can distinguish which pairs of simulated neurons are synaptically connected and which are not. We applied our model and two previously used synapse detection methods: the thresholding method and spike jitter method, to the two simulations described above. Briefly, the thresholding method is based on testing if the peak or trough in the correlogram immediately following a presynaptic spike is significantly different from a constant, baseline number of coincidences. Since the baseline is estimated with a single value, the thresholding method is generally effective in cases where there is little fluctuation but will not work well in situations where there are strong fluctuations (e.g. due to shared common input). To account for these fluctuations, Hatsopoulos et al. (2003)

502 developed a pattern jitter method where jittered spike trains generate a baseline cross-correlogram that  
503 preserves slow structure in the correlogram while removing fast, transient effects such as those due to a synaptic  
504 connection. The spike jitter method is then based on testing if the peak or trough is significantly different from  
505 the local baseline estimated from the jittered spikes (see Methods for more details). In both the thresholding and  
506 the jitter methods there is no explicit model for the slow effects and fast, synaptic effects, and each cross-  
507 correlogram is treated as a separate hypothesis test. In contrast, the extended GLM uses an explicit, parametric  
508 structure for the slow and fast effects, as well as constraints based on neuron type and conduction velocity.

509  
510 Since we know where the connections are in the simulations, we can compare the performance of the model-  
511 based method to the thresholding and spike jitter methods. Fig. 4A and 4B show the overall receiver operating  
512 characteristic (ROC) curves for each method, for the two simulated networks, respectively. These curves  
513 compare the true positive rate (where a true, simulated synaptic connection is detected as a connection,  
514 regardless of whether the connection was excitatory or inhibitory) and the false positive rate (where the simulated  
515 neurons were not connected, but the method detected a connection). For Simulation 1 with common inputs, the  
516 extended GLM without any network constraints (area under the curve, AUC = .94) performs better than jitter  
517 method (AUC = .91) and thresholding method (AUC = .75). With the constraints on neuron type and conduction  
518 velocity, the performance of the model-based method improves (AUC = .98). Similarly, for Simulation 2 with real  
519 presynaptic inputs, the extended GLM with constraints (AUC = .89) outperforms the model without constraints  
520 (AUC = .85), the jitter method (AUC = .85), and the threshold method (AUC = .85). The standard errors of AUC  
521 generated using bootstrap for all the methods are less than .04.

522  
523 Although all methods perform well above chance in detecting connections, we find that both the jitter method  
524 and thresholding method have a bias towards the detection of excitatory connections. When the decision criterion  
525 is set such that the number of false positives is small (less than ~10%) both methods detect far more excitatory  
526 connections than inhibitory connections, despite the fact that the number and strengths of excitatory and  
527 inhibitory connections were approximately balanced in the simulations. This bias may be partially due to the fact  
528 that here, for jitter method and thresholding method, we approximate the noise distribution of the correlograms  
529 using a normal distribution (z-scores), rather than using an empirical distribution. On the other hand, the extended  
530 GLM shows no preference for either excitatory or inhibitory connections (Fig. 4B & E).

531  
532 In addition to the overall performance and the performance on different cell types, we also expect the detectability  
533 of synapses to depend on the synaptic strength and the rates of the pre- and postsynaptic neurons. Here we  
534 find that, for both of the simulations, the extended GLM with constraints and the jitter method perform at a similar  
535 level for strong connections, but that the extended GLM has better detection for weak connections (Fig. 4C and  
536 F). We also find that the performance of both methods varies as a function of the firing rate of presynaptic  
537 neurons. Here the extended GLM outperforms the jitter method at all rates, but both of the methods show better  
538 performance for synaptic connections where the presynaptic firing rate is high compared to those where rate is  
539 low (Fig. 4G). By incorporating the learned network information, the extended GLM with constraints appears to

540 better detect weak connections and rule out false positives. For example, although both the extended GLM and  
 541 the jitter method can detect strong excitatory connections (Fig. 4H, top two correlograms), the jitter method has  
 542 more false positives and false negatives. It may fail to detect a weak connection that does not exceed threshold  
 543 (the third correlogram), or falsely detect a non-connection if there is noise that exceeds threshold (the bottom  
 544 correlogram). On the other hand, if the weak connection has a sign and latency consistent with the constraints,  
 545 the extended GLM can successfully detect it, and if the sign or latency are inconsistent with the constraints,  
 546 the extended GLM can successfully rule this connection out (Fig. 4H).

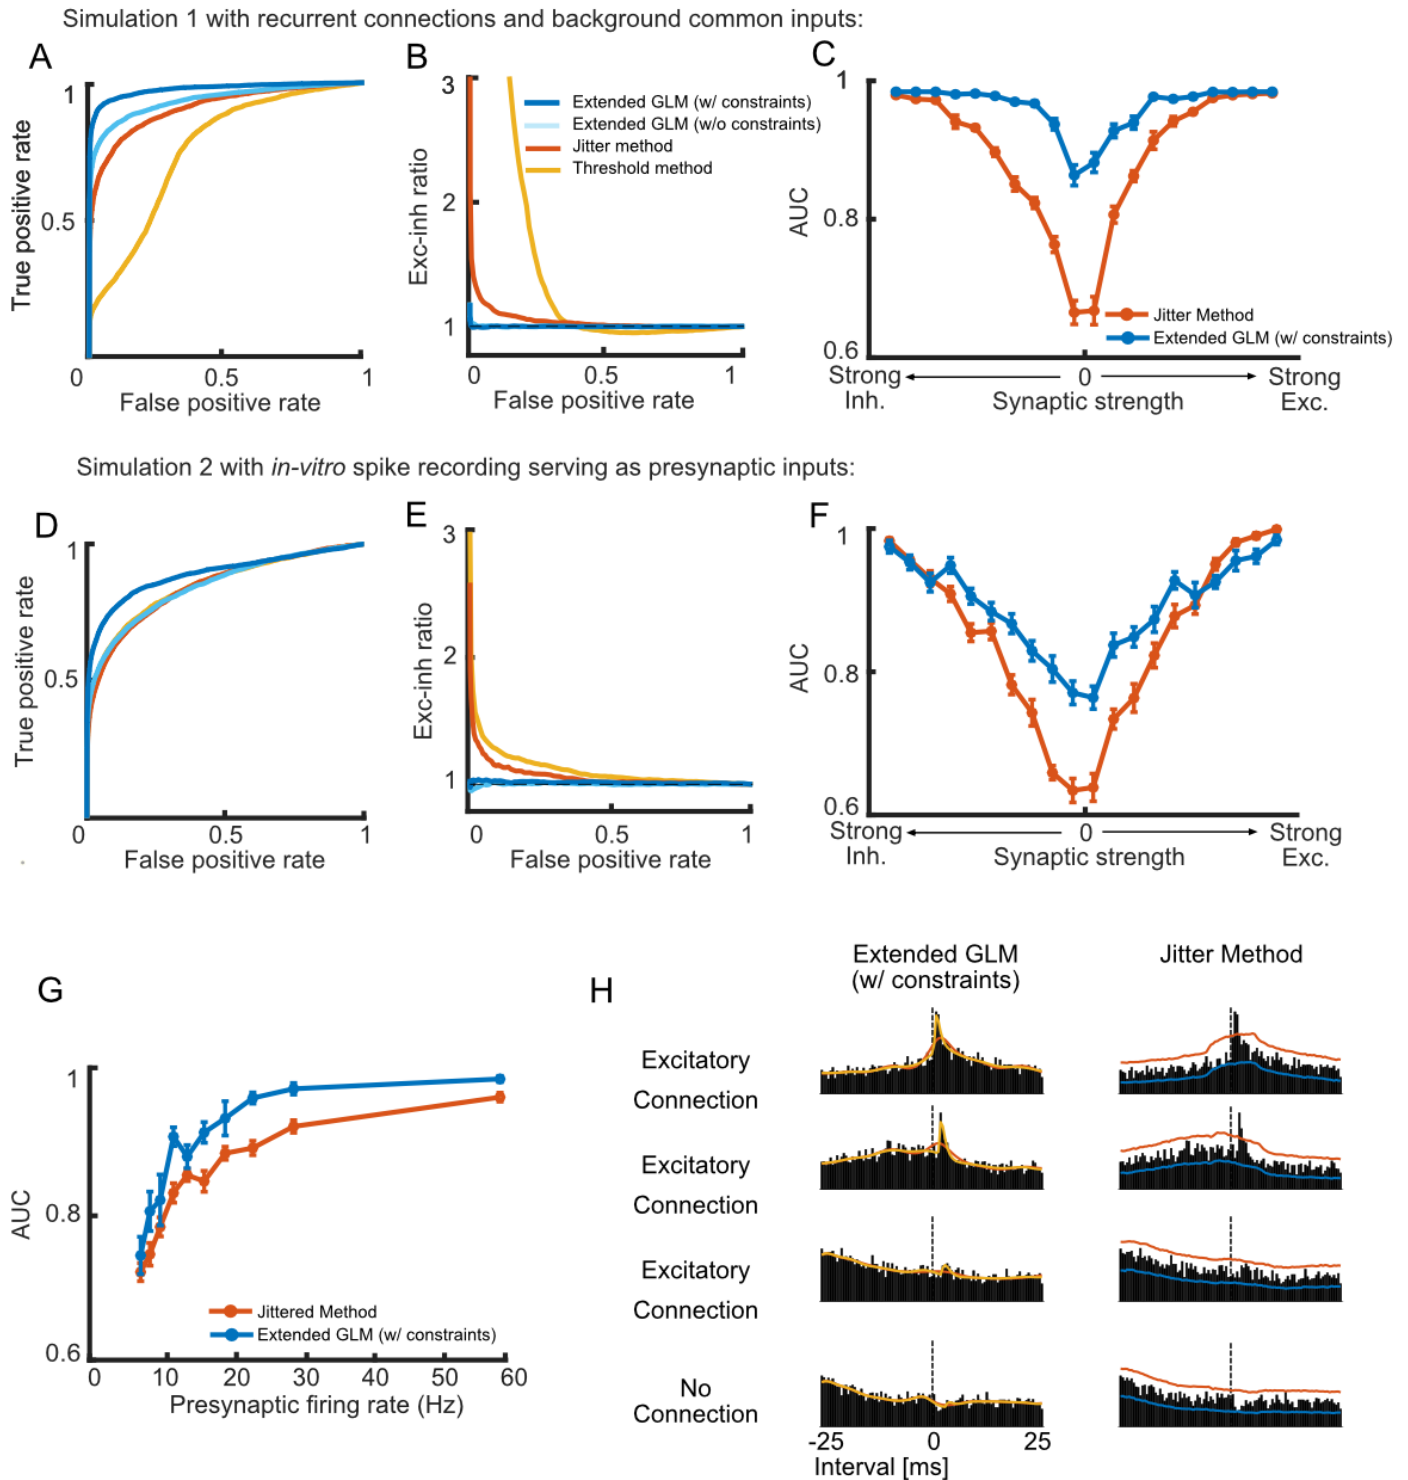

548

549 Figure 4: The extended GLM with constraints outperforms the jitter and thresholding methods on both of the simulations. Panel A, B and  
550 C show the results from Simulation 1 with background common inputs. Panel D, E and F show the results from Simulation 2 with real  
551 presynaptic inputs. A & D: ROC curves for the extended GLM with and without constraints, jitter method, and thresholding method. B &  
552 E: Jitter method and thresholding method are biased towards the detection of excitatory connections. The y-axis is the ratio of the  
553 excitatory true positive rate and the inhibitory true positive rate. If the method has no preference for connection type, the ratio should be  
554 1. C & F: The extended GLM with constraints performs better than jitter method especially on weak connections. Here we divide the  
555 synaptic connections into 20 groups based on their synaptic weights and calculate AUC for each group (each group contains 5% of the  
556 connections). The error bars denote standard error (estimated using bootstrapping). G: The performance of both of the two methods is  
557 affected by the presynaptic firing rate. We divide all the presynaptic neurons into 10 groups based on their firing rates and calculate AUC  
558 for each group (each group contains 10% of the presynaptic neuron). Only results from Simulation 2 are shown, since there is a wide  
559 range of presynaptic firing rates. H: The extended GLM with constraints can better detect weak connections and rule out the false positives  
560 based on the learned structural information. The two columns show the same four cross-correlograms with the same excitatory  
561 presynaptic neuron along with the results for the extended GLM (left) and the jitter method (right). For the model the yellow line represents  
562 the full model with positive alpha function, and the red line represents the slow model. For the jitter method, the red and blue lines denote  
563 the upper and lower bounds, respectively.

564

## 565 **Synapse detection with *in vitro* multielectrode array (MEA) data**

566

567 In order to evaluate the performance of our method on real data, we apply it to spontaneous *in vitro* spike activity  
568 recorded in a mouse somatosensory cortex slice culture using a 512-electrode array (see Methods). Here we  
569 adopt two representative datasets: dataset #13 and dataset #23, and examine potential connections between  
570 neurons with >1000 spikes recorded. Before we run the model on the dataset, in order to get rid of the possible  
571 influence of spike sorting problems, we exclude the neuron pairs when there is an anomalous peak or trough  
572 right in the middle of the correlogram (<7% of pairs, see Methods for more details).

573

574 Since we don't know the ground truth about where the synaptic connections are in the *in vitro* data, we are not  
575 able to directly measure the performance of our synapse detection methods. However, we can qualitatively  
576 assess whether or not the method gives results consistent with what we expect. We first validate whether our  
577 method can correctly classify excitatory neurons and inhibitory neurons by analyzing the shape the spike  
578 waveform of each neuron. Previous studies have shown that the excitatory neurons typically have broader spike  
579 waveforms, while the majority of inhibitory neurons have narrower spike waveforms (Barthó et al. 2004). In the  
580 two datasets used here, the neurons with broader waveforms are more likely to be classified as excitatory  
581 neurons by our model based on their putative synaptic connections, but the results for neurons with narrow  
582 waveforms are mixed (Fig. 5A). To quantify the relationship between waveform and connectivity, we fit a  
583 Gaussian mixture model with 3 components to the trough-to-peak duration and half-amplitude duration of the  
584 waveforms creating three clusters for "broad waveforms", "narrow waveforms", and "outliers". After assigning  
585 each neuron to a cluster (based on the posterior probability), we analyze the consistency between the waveform  
586 shape and the neuron type given by their putative connections. From the presynaptic neurons with putative  
587 connections detected by our method, we find that 77% of the "broad-spiking" neurons are classified as putative  
588 excitatory neurons based on their connectivity, and 47% of the "narrow-spiking" neurons are classified as putative

589 inhibitory neurons. Inhibitory, non-fast-spiking neurons with broad waveforms have been previously reported  
590 (Dehghani et al. 2016), however, excitatory neurons with narrow waveforms are unexpected. There are likely to  
591 be some cases where the extended GLM misidentifies the neuron type, however, there are also cases where  
592 neurons with narrow waveforms appear to have putative excitatory connections with typical short-latency, fast  
593 transient increases in the cross-correlograms. This difference may, in part, be due to differences in the waveforms  
594 recorded by *in vitro* recordings. Many single units in the MEA data here appear to be narrow due to the fact that  
595 they have triphasic waveforms. Previous work suggests that this could indicate a nearby axon (Barry 2015;  
596 Gesteland et al. 1982; Robbins et al. 2013).

597  
598 We then analyze the properties of the putative synaptic connections detected by our method. Here we pick the  
599 thresholds for our method based on the maximum MCC from the simulation with background fluctuations (see  
600 details in Methods). We first find that the neurons close to each other are more likely to have putative connections  
601 (Fig. 5B). The median distance between neuron pairs with putative connections is 701  $\mu\text{m}$ , compared to a median  
602 distance between all the neurons of 813  $\mu\text{m}$  for dataset #13. And for dataset #23, the median distance between  
603 neuron pairs with putative connections is 810  $\mu\text{m}$  compared to the median distance between all the neurons 859  
604  $\mu\text{m}$ . These results are consistent with previous findings in other cortical areas that the probability of a synaptic  
605 connection decreases with distance (pyramidal cells in layer 2/3 of rat visual and somatosensory cortex:  
606 Holmgren et al. 2003; pyramidal cells in layer 5 of rat visual cortex: Song et al. 2005).

607  
608 We then examine to what extent the synaptic latencies of the putative connections from one presynaptic neuron  
609 increase as function of distance. For each neuron with more than 2 putative connections (409 out of 602 neurons  
610 across both datasets), we calculate the Pearson correlation coefficient  $r$  between the estimated synaptic latency  
611  $\Delta t$  and the distance between the corresponding pre and postsynaptic neuron. Fig. 5E shows the histogram of all  
612 the correlation coefficients of the two datasets, 69% of the neurons show a positive correlation between the  
613 estimated synaptic latency and distance between neurons, 33% of them are statistically significant ( $p < .05$ ). Fig.  
614 5C shows some examples of presynaptic neurons that have many connections and are consistent with a linearly  
615 increasing latency-distance relationship ( $r > 0$ ). We find both putative excitatory and putative inhibitory cases  
616 where this relationship seems to hold. In the cases where the neurons don't obey the rule ( $r < 0$ , 31% of the  
617 neurons), the accuracy of the linear fit of the latency-distance relationship tends to be lower. Under the extended  
618 GLM the constraint on the synaptic latency for these ill-predicted connections ( $\eta_{\Delta t}$ ) is also weaker (unpaired t-  
619 test  $t(216) = -2.49, p < .05, CI = [-2.19, -.25]$ , Fig. 5F). Since the strength of the constraint in our model is  
620 partially based on how well the latency-distance relationship is fit by a linear trend, these constraints thus have  
621 a weaker influence and our method is still able to detect putative connections at unexpected latencies (Fig. 5D).

622  
623 We then compare the putative connections detected by the extended GLM and the jitter method on these same  
624 datasets. As with our method, we pick the threshold for jitter method based on the maximum MCC (see details  
625 in Methods) from Simulation 1 with background fluctuations. In general, the extended GLM and jitter method  
626 detect highly distinct sets of connections (Fig. 5G and 5H). Here we sort the neurons based on the similarity of



627 their putative connections detected by our method (using hierarchical clustering). For the Hinton plot of our  
628 method, the size of each square represents the magnitude of the estimated synaptic weight  $w_{i,j}$  of the  
629 corresponding neuron pair. For the Hinton plot of jitter method, the size of each square represents the magnitude  
630 of the z-score of the corresponding neuron pair.

631  
632 Based on the Hinton plots, we do see that the results from our method and jitter method show certain agreements  
633 on the detection of putative connections, especially on the strong connections: For dataset #13, the two methods  
634 show the same detection results (whether there is a synaptic connection or not) on 98.8% of the neuron pairs,  
635 for dataset #23, the two method show the same detection results on 95.8% of the neuron pairs. However, since  
636 the vast majority of pairs are not connected, we also use MCC to measure the similarity between the results of  
637 the two methods. The MCC between the results of the two methods is .38 (dataset #13) and .51 (dataset #23),  
638 which implies some disagreements between the results of the two methods. We find that jitter method reports  
639 more putative connections than our method (dataset #13: 1507 vs. 1197, dataset #23: 3678 vs. 3185). In addition,  
640 our method reports more putative inhibitory connections. For dataset #13, 26.8% (321 out of 1197) of the putative  
641 connections are inhibitory when using our method, while 7.4% (111 out of 1507) of the putative connections are  
642 inhibitory when using jitter method. For dataset #23, 48.7% (1550 out of 3185) of the putative connections are  
643 inhibitory when using our method, while 16.3% (599 out of 3679) of the putative connections are inhibitory when  
644 using jitter method.

645

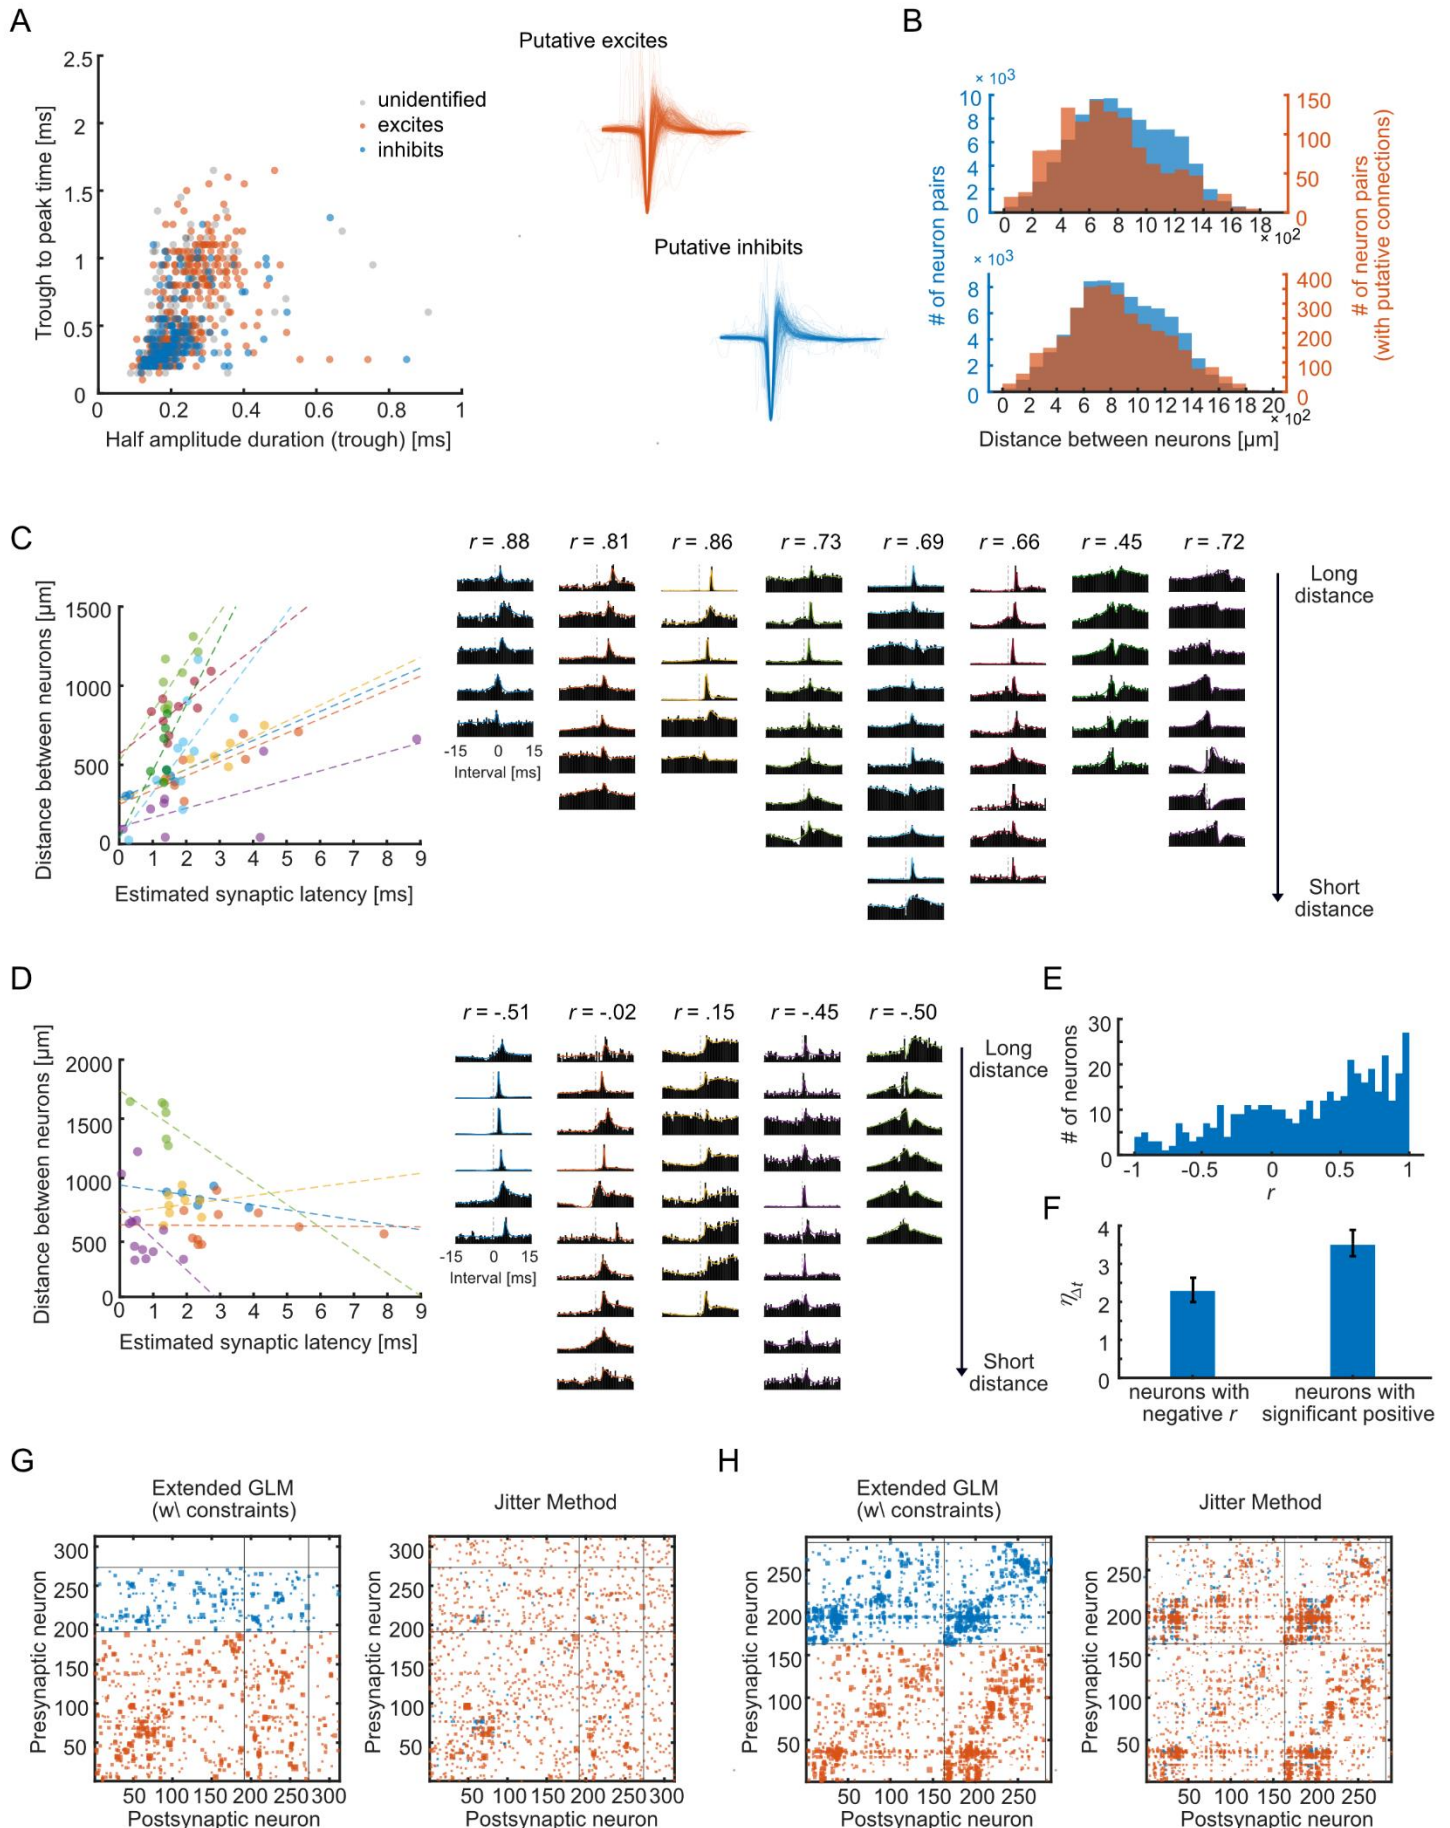

646

647

Figure 5: Applying the extended GLM to *in vitro* multielectrode array data. A: left: most of the neurons with wide waveforms are classified

648 as putative excitatory neurons by our method, while the results for neurons with narrower waveforms are rather mixed. Right: The  
649 waveforms of putative excitatory neurons and inhibitory neurons. For putative inhibitory neurons, the waveforms are narrow, while for the  
650 putative excitatory neurons, there are two clusters of waveforms. B: the histograms of the distance between neurons (top: dataset #13,  
651 bottom: dataset #23). Distances for all neuron pairs are in blue, while distance for neuron pairs with putative connections are in red. C &  
652 D: examples of neurons where the relationship between synaptic latency and distance is consistent with an increasing linear trend (panel  
653 C) and inconsistent with such a trend (panel D). Left: data points with the same color represent putative connections from the same  
654 presynaptic neuron. The dotted lines show the linear regression of the estimated synaptic latency and distance. Right: cross-correlograms  
655 for these connections with colors corresponding to the scatter plot. E: the histogram of Pearson correlation between the putative synaptic  
656 latency and distance for all the presynaptic neurons. F: mean  $\eta_{\Delta t}$  for the neurons that don't obey the latency rule ( $r < 0$ ) and the neurons  
657 that obey the rule ( $r > 0$  &  $p < .05$ ). G & H: Hinton plots for dataset #13 (G) and #23 (H) using the extended GLM and jitter method,  
658 respectively. The putative excitatory connections are marked in red. The putative inhibitory connections are marked in blue. Here all the  
659 neurons are sorted by the similarity of their putative connections detected by our method. Each row represents the connections from one  
660 presynaptic neuron. In each Hinton plot, the two horizontal lines separate the neurons with no putative connections, putative inhibitory  
661 neurons, and the putative excitatory neurons. The two vertical lines mark the same boundaries for postsynaptic neurons.

## 662 Discussion

663 Traditionally, intracellular recording represents a gold standard for characterizing synaptic connections.  
664 Detecting synaptic connections using the intracellularly recorded postsynaptic potentials and currents is  
665 straightforward and reliable (Harris et al. 2016; Song et al. 2005). However, only a relatively small number of  
666 neurons can be recorded simultaneously using intracellular recording, particularly *in vivo* (but see Pawlak et al.  
667 2013). In recent decades, advances in multielectrode arrays have allowed the spiking of hundreds to thousands  
668 of neurons to be recorded simultaneously *in vivo* or *in vitro* with thousands of potential synapses between them  
669 (Cheung et al. 2007; Ito et al. 2014; Seeman et al. 2018; Spira and Hai 2013). Distinguishing the monosynaptic  
670 connections from the many tens of thousands of possible connections in these large-scale extracellular  
671 recordings is a difficult statistical problem. Previous methods for distinguishing putative synaptic connections  
672 and non-connections in large-scale recordings have used separate hypothesis tests on the cross-correlograms  
673 of all potentially connected neuron pairs (Hatsopoulos et al. 2003; Pastore et al. 2018; Perkel et al. 1967b). Here  
674 we develop an extension of a Generalized Linear Model that explicitly separates fast synaptic effects and slow  
675 background fluctuations and also incorporates two structural constraints learned from the whole network:  
676 presynaptic neuron type and the relationship between the synaptic latency and distance between pre- and  
677 postsynaptic neurons. On two simulated integrate-and-fire networks, our model outperforms previous synapse  
678 detection methods (the threshold method and spike jitter method), especially on the weak connections. We also  
679 apply our model on *in vitro* multielectrode arrays (MEAs) data. Here our model recovers plausible connections  
680 from hundreds of neurons recorded extracellularly.

681  
682  
683 Many factors affect how likely a synaptic connection is to be detected, including the firing rates of the pre- and  
684 postsynaptic neurons, the recording time, and the synaptic strength. Here, in our simulations, we find that the  
685 model-based approach outperforms the hypothesis testing-based approaches for a wide range of firing rates  
686 and shows particular improvement for detecting weak connections. At the same time, in our simulations, the  
687 model-based methods outperform the hypothesis test-based methods at all thresholds. That is, the distributions

688 of likelihood ratios for connections and non-connections are more distinct than the distributions of test statistics  
689 with the jitter or thresholding methods. In practice, however, when detecting putative synapses, the choice of  
690 threshold has a strong effect on how many synapses are detected and also how many false positives there are.  
691 Here, in detecting putative synapses in experimental data we apply the same optimal (MCC maximizing)  
692 threshold from the simulation. This is largely for illustration, but selecting an appropriate threshold for  
693 experimental recordings depends on the researchers' tolerance for false positives and false negatives. Ultimately,  
694 the choice of threshold should be based on the aims of the analysis and the costs/benefits of mistakes in  
695 interpreting the underlying data.

696  
697 Since we don't know the ground truth for experimental data, it is possible that the threshold used here might be  
698 either too strict or too permissive. However, the performance of the model-based method may be somewhat  
699 more robust to the choice of threshold than the jitter and thresholding methods. In our simulations, we find that  
700 both the jitter method and thresholding method show strong biases towards detecting excitatory connections,  
701 particularly at strict thresholds with few false positives. The model-based approach, on the other hand, detects  
702 excitatory and inhibitory connections in proportion to their prevalence in the simulation at all the thresholds. The  
703 bias of the jitter method may be due to the fact that we here measure test statistics assuming that spike counts  
704 follow a normal distribution. This approximation clearly does not accurately account for the fact that spike counts  
705 can only be non-negative. However, in practice we find that this type of smooth approximation has better  
706 performance at strict thresholds compared to using the empirical count distributions (using the percentile of the  
707 true counts in the jittered count distribution), which do not have smooth tails. These biases we find in the  
708 simulation results may indicate that, when we apply these methods to real data, jitter method and thresholding  
709 method may distort the observed E-I ratio if the threshold is too strict. Consistent with the simulation results, in  
710 the *in vitro* data analysis, we find that the jitter method also typically detects many more excitatory than inhibitory  
711 connections (5-13x more), while the model-based method detects putative connections with a larger EI ratio  
712 (~3:1). Previous work has found that approximately one in five neurons is GABAergic in many neocortical areas  
713 and species (Hendry et al. 1987; Sahara et al. 2012). Although there are many factors that might influence the  
714 observed EI ratios when measuring putative synapses from spikes, the model-based approach appears to be  
715 less biased.

716  
717 In the model-based approach, we learn two structural constraints from the whole network: presynaptic neuron  
718 type and the relationship between the synaptic latency and distance between pre- and postsynaptic neurons.  
719 For the presynaptic neuron type, using the simulation, we find that the model-based approach is able to  
720 successfully classify most neurons. However, when applying the method to the *in vitro* data, we compare the  
721 neuron type estimated based on putative synaptic connections with waveform shapes, and find that our results  
722 are somewhat less clear than previous findings *in vivo* (Barthó et al. 2004). Instead of two, well separated  
723 excitatory (broad waveforms) and inhibitory (narrow waveforms) clusters, we find substantial mixing of types  
724 across clusters. This may be partially due to the particulars of organotypic slice recording. Previous works have  
725 found that the waveforms in these recordings tend to be more triphasic potentially due to axonal conductance



726 (Barry 2015; Robbins et al. 2013), and this could lead to misestimation of waveform width. New methods, such  
727 as optotagging (Lima et al. 2009) or optrodes (English et al. 2017) may offer a more reliable identification of  
728 neuron type. However, in the absence of experimental verification, it is difficult to evaluate the accuracy of cell  
729 type inferences. Additionally, although here we assume that presynaptic neurons are either exclusively excitatory  
730 or exclusively inhibitory, there is recent and growing evidence that presynaptic neurons can co-release multiple  
731 neurotransmitters (Root et al. 2014).

732  
733 For the relationship between the synaptic latency and distance between pre- and postsynaptic neurons, we found  
734 that the model-based method can successfully learn linear relationships in simulation and that these constraints  
735 improve detection performance. In the *in vitro* data, we also find that for most of the neurons, the synaptic  
736 latencies tend to increase with the distance between the pre- and postsynaptic neurons. However, there appears  
737 to be a portion of neurons that don't show this pattern. In many cases, we may not have enough putative synaptic  
738 connections to estimate such a trend. In the cases where there are enough connections, there may not be a  
739 trend due to several other reasons. First, the locations of the somas are only approximate – based on which  
740 electrodes have the highest amplitude waveforms. Second, although here we model presynaptic conduction  
741 velocity, it's possible that the dendritic distance constitutes a large portion of the distance. And third, the straight-  
742 line distance between somas may not be the same as the trajectory of the axons/dendrites. Although previous  
743 theoretical work on the minimum wiring length principle might suggest the conduction distance between two  
744 neurons can be well approximated with straight-line (Chklovskii et al. 2002; Koulakov and Chklovskii 2001), there  
745 are clearly many sources of uncertainty when estimating conduction velocity here. However, it is important to  
746 note that, within the extended GLM, the conduction velocity is only a soft constraint, and the strength of the  
747 constraint is related to how accurately the relationship is fit by a straight line. We are still able to detect  
748 connections even if the relationship between synaptic latency and distance is not clearly linear.

749  
750 With the model-based method, we are able to learn the properties of each presynaptic neuron (type and  
751 conduction velocity) and use these properties to better detect individual synaptic connections based whether  
752 they are consistent with these properties. However, we could potentially include other sources of information to  
753 better estimate these properties. For instance, cell types can be classified according to: mean firing rate, the  
754 mode of the inter-spike interval distribution, burstiness, and spike asymmetry (English et al. 2017), and  
755 conduction velocity could also potentially be estimated using spatiotemporal electrical image generated using  
756 the spike waveforms across multiple electrodes (Li et al. 2015). In addition, the model-based approach is flexible  
757 enough that other constraints could also be incorporated. For instance, we could use constraints based on  
758 connectivity across and between brain regions or other network structure (Linderman et al. 2016). Finally, as  
759 neural recording techniques continue developing, increasing numbers of neurons can be recorded  
760 simultaneously (Stevenson and Kording 2011). These recordings have the potential to contain more  
761 monosynaptic connections per recording, and this should result in more reliable estimation of neuronal properties.

762  
763 Although the methods presented here are likely to be useful for large-scale detection of putative synaptic

connections, modeling the cross-correlogram directly does not necessarily provide unambiguous evidence for or against the presence of a synapse. The shape of the cross-correlogram depends on the dynamics of the presynaptic neuron (Perkel et al. 1967b), and can be influenced by many other factors, such as common input from unobserved neurons (Gerstein et al. 1989; Stevenson et al. 2008). Other methods may allow more detailed pattern in spiking to be modeled (Casadiego et al. 2018; Chen et al. 2011; Ito et al. 2011; Kadirvelu et al. 2017; Ladenbauer et al. 2019; Monasson and Cocco 2011; Song et al. 2013). Additionally, although we account for some potential structure due to properties of presynaptic neurons, modeling multiple inputs to the same postsynaptic neuron will likely result in more accurate estimates of the true connectivity (Roudi et al. 2015; Volgushev et al. 2015; Zaytsev et al. 2015). In a recent work, Kobayashi et al. 2019 also approach the problem of synapse detection from cross-correlograms, and find that a model-based approach combining a slow background effect and a fast synaptic effect provides improved performance. Here we show how constraints on cell type and latency may further improve detection accuracy.

Ultimately, being able to accurately detect putative synaptic connections from large-scale extracellular recordings opens a host of neuroscientific questions. Previous work found that synaptic weights detected from spikes can have strong type-dependent structure (Barthó et al. 2004), seem to vary based on behavior (Fujisawa et al. 2008), and also have substantial short-term dynamics (English et al. 2017; Ghanbari et al. 2017). Our method provides an additional tool for detecting these connections using large-scale recordings. With the development of larger-scale recording techniques, this approach may help us better understand how the properties of single neuronal connections relate to population neural activity and behavior.

## References

- Barry JM.** Axonal activity in vivo: technical considerations and implications for the exploration of neural circuits in freely moving animals. *Front Neurosci* 9, 2015.
- Barthó P, Hirase H, Monconduit L, Zugaro M, Harris KD, Buzsáki G.** Characterization of neocortical principal cells and interneurons by network interactions and extracellular features. *J Neurophysiol* 92: 600–608, 2004.
- Boughorbel S, Jarray F, El-Anbari M.** Optimal classifier for imbalanced data using Matthews Correlation Coefficient metric. *PLoS One* 12: e0177678, 2017.
- Casadiego J, Maoutsa D, Timme M.** Inferring Network Connectivity from Event Timing Patterns. *Phys Rev Lett* 121, 2018.
- Chen Z, Putrino DF, Ghosh S, Barbieri R, Brown EN.** Statistical inference for assessing functional connectivity of neuronal ensembles with sparse spiking data. *IEEE Trans Neural Syst Rehabil Eng* 19: 121–135, 2011.
- Cheung KC, Renaud P, Tanila H, Djupsund K.** Flexible polyimide microelectrode array for in vivo recordings and current source density analysis. *Biosens Bioelectron* 22: 1783–1790, 2007.
- Chklovskii DB, Schikorski T, Stevens CF.** Wiring optimization in cortical circuits. *Neuron* 34: 341–347, 2002.
- Dehghani N, Peyrache A, Telenczuk B, Le Van Quyen M, Halgren E, Cash SS, Hatsopoulos NG, Destexhe A.** Dynamic balance of excitation and inhibition in human and monkey neocortex. *Sci Rep* 6, 2016.
- Eccles JC, Fatt P, Koketsu K.** Cholinergic and inhibitory synapses in a pathway from motor-axon collaterals to motoneurons. *J Physiol* 126: 524–562, 1954.



- 802 **English DF, McKenzie S, Evans T, Kim K, Yoon E, Buzsáki G.** Pyramidal cell-interneuron circuit architecture and  
803 dynamics in hippocampal networks. *505–520*, 2017.
- 804 **Fetz E, Toyama K, Smith W.** Synaptic interactions between cortical neurons. In: *Normal and Altered States of Function.*  
805 *Cerebral cortex*, edited by Peters A, Jones EG. Boston, MA: Springer, 1991, p. 1–47.
- 806 **Fujisawa S, Amarasingham A, Harrison MT, Buzsáki G.** Behavior-dependent short-term assembly dynamics in the  
807 medial prefrontal cortex. *Nat Neurosci* , 2008. doi:10.1038/nn.2134.
- 808 **Gerstein GL, Bedenbaugh P, Aertsen A.** Neuronal assemblies. *IEEE Trans Biomed Eng* 36: 4–14, 1989.
- 809 **Gesteland RC, Yancey RA, Farbman AI.** Development of olfactory receptor neuron selectivity in the rat fetus.  
810 *Neuroscience* 7, 1982.
- 811 **Ghanbari A, Malyshev A, Volgushev M, Stevenson IH.** Estimating short-term synaptic plasticity from pre- and  
812 postsynaptic spiking. *PLoS Comput Biol* 13: e1005738, 2017.
- 813 **Hahn G, Ponce-Alvarez A, Deco G, Aertsen A, Kumar A.** Portraits of communication in neuronal networks. *Nat Rev*  
814 *Neurosci* 20: 117–127, 2019.
- 815 **Harris KD, Csicsvari J, Hirase H, Dragoi G, Buzsáki G.** Organization of cell assemblies in the hippocampus. *Nature* 424:  
816 552–556, 2003.
- 817 **Harris KD, Quiroga RQ, Freeman J, Smith SL.** Improving data quality in neuronal population recordings. *Nat Neurosci* 19:  
818 1165–1174, 2016.
- 819 **Hatsopoulos N, Geman S, Amarasingham A, Bienenstock E.** At what time scale does the nervous system operate?  
820 *Neurocomputing* 52–54: 25–29, 2003.
- 821 **Hendry S, Schwark H, Jones E, Yan J.** Numbers and proportions of GABA-immunoreactive neurons in different areas of  
822 monkey cerebral cortex. *J Neurosci* 7: 1503–1519, 1987.
- 823 **Holmgren C, Harkany T, Svennenfors B, Zilberter Y.** Pyramidal cell communication within local networks in layer 2/3 of  
824 rat neocortex. *J Physiol* 551: 139–53, 2003.
- 825 **Ito S, Hansen ME, Heiland R, Lumsdaine A, Litke AM, Beggs JM.** Extending transfer entropy improves identification of  
826 effective connectivity in a spiking cortical network model. *PLoS One* 6: e27431, 2011.
- 827 **Ito S, Yeh FC, Hiolski E, Rydygier P, Gunning DE, Hottowy P, Timme N, Litke AM, Beggs JM.** Large-scale, high-  
828 resolution multielectrode-array recording depicts functional network differences of cortical and hippocampal cultures. *PLoS*  
829 *One* 9, 2014.
- 830 **Kadirvelu B, Hayashi Y, Nasuto SJ.** Inferring structural connectivity using Ising couplings in models of neuronal networks.  
831 *Sci Rep* 7, 2017.
- 832 **Kobayashi R, Kurita S, Kurth A, Kitano K, Mizuseki K, Diesmann M, Richmond BJ, Shinomoto S.** Reconstructing  
833 neuronal circuitry from parallel spike trains. *Nat Commun* 10, 2019.
- 834 **Koulakov AA, Chklovskii DB.** Orientation preference patterns in mammalian visual cortex: A wire length minimization  
835 approach. *Neuron* 29: 519–527, 2001.
- 836 **Ladenbauer J, McKenzie S, English DF, Hagens O, Ostojic S.** Inferring and validating mechanistic models of neural  
837 microcircuits based on spike-train data. *Nat Commun* 10, 2019.
- 838 **Levenstein D, Buzsáki G, Rinzel J.** NREM sleep in the rodent neocortex and hippocampus reflects excitable dynamics.  
839 *Nat Commun* 10: 2478, 2019.
- 840 **Li PH, Gauthier JL, Schiff M, Sher A, Ahn D, Field GD, Greschner M, Callaway EM, Litke AM, Chichilnisky EJ.**  
841 Anatomical identification of extracellularly recorded cells in large-scale multielectrode recordings. *J Neurosci* 35: 4663–4675,  
842 2015.

- 843 **Lima SQ, Hromádka T, Znamenskiy P, Zador AM.** PINP: A New Method of Tagging Neuronal Populations for Identification  
844 during In Vivo Electrophysiological Recording. *PLoS One* 4: e6099, 2009.
- 845 **Linderman SW, Adams RP, Pillow JW.** Bayesian latent structure discovery from multi-neuron recordings. In: *Advances in*  
846 *Neural Information Processing Systems*. 2016, p. 2010–2018.
- 847 **Liu Y-H, Wang X-J.** Spike-Frequency Adaptation of a Generalized Leaky Integrate-and-Fire Model Neuron. *J Comput*  
848 *Neurosci* 10: 25–45, 2001.
- 849 **Matthews BW.** Comparison of the predicted and observed secondary structure of T4 phage lysozyme. *Biochim Biophys*  
850 *Acta - Protein Struct* 405: 442–451, 1975.
- 851 **Monasson R, Cocco S.** Fast inference of interactions in assemblies of stochastic integrate-and-fire neurons from spike  
852 recordings. *J Comput Neurosci* 31: 199–227, 2011.
- 853 **Okun M, Steinmetz NA, Cossell L, Iacaruso MF, Ko H, Barthó P, Moore T, Hofer SB, Mrsic-Flogel TD, Carandini M,**  
854 **Harris KD.** Diverse coupling of neurons to populations in sensory cortex. *Nature* 521: 511–515, 2015.
- 855 **Pastore VP, Massobrio P, Godjoski A, Martinoia S.** Identification of excitatory-inhibitory links and network topology in  
856 large-scale neuronal assemblies from multi-electrode recordings. *PLoS Comput Biol* 14, 2018.
- 857 **Pawlak V, Greenberg DS, Sprekeler H, Gerstner W, Kerr JND.** Changing the responses of cortical neurons from sub- To  
858 suprathreshold using single spikes in vivo. *Elife* 2013: 10–12, 2013.
- 859 **Perkel DH, Gerstein GL, Moore GP.** Neuronal Spike Trains and Stochastic Point Processes: I. The Single Spike Train.  
860 *Biophys J* 7: 391–418, 1967a.
- 861 **Perkel DH, Gerstein GL, Moore GP.** Neuronal Spike Trains and Stochastic Point Processes: II. Simultaneous Spike Trains.  
862 *Biophys J* 7: 419–440, 1967b.
- 863 **Pillow JW, Shlens J, Chichilnisky EJ, Simoncelli EP.** A Model-Based Spike Sorting Algorithm for Removing Correlation  
864 Artifacts in Multi-Neuron Recordings. *PLoS One* 8, 2013.
- 865 **Robbins AA, Fox SE, Holmes GL, Scott RC, Barry JM.** Short duration waveforms recorded extracellularly from freely  
866 moving rats are representative of axonal activity. *Front Neural Circuits* 7, 2013.
- 867 **Root DH, Mejias-Aponte CA, Zhang S, Wang HL, Hoffman AF, Lupica CR, Morales M.** Single rodent mesohabenular  
868 axons release glutamate and GABA. *Nat Neurosci* 17: 1543–1551, 2014.
- 869 **Roudi Y, Dunn B, Hertz J.** Multi-neuronal activity and functional connectivity in cell assemblies. *Curr Opin Neurobiol* 32:  
870 38–44, 2015.
- 871 **Sahara S, Yanagawa Y, O’Leary DDM, Stevens CF.** The fraction of cortical GABAergic neurons is constant from near the  
872 start of cortical neurogenesis to adulthood. *J Neurosci* 32: 4755–61, 2012.
- 873 **Sakaguchi T, Okada M, Kitamura T, Kawasaki K.** Reduced diameter and conduction velocity of myelinated fibers in the  
874 sciatic nerve of a neurofilament-deficient mutant quail. *Neurosci Lett* 153: 65–68, 1993.
- 875 **Seeman SC, Campagnola L, Davoudian PA, Hoggarth A, Hage TA, Bosma-Moody A, Baker CA, Lee JH, Mihalas S,**  
876 **Teeter C, Ko AL, Ojemann JG, Gwinn RP, Silbergeld DL, Cobbs C, Phillips J, Lein E, Murphy G, Koch C, Zeng H,**  
877 **Jarsky T.** Sparse recurrent excitatory connectivity in the microcircuit of the adult mouse and human cortex. *Elife* 7, 2018.
- 878 **Song D, Wang H, Tu CY, Marmarelis VZ, Hampson RE, Deadwyler SA, Berger TW.** Identification of sparse neural  
879 functional connectivity using penalized likelihood estimation and basis functions. *J Comput Neurosci* 35: 335–357, 2013.
- 880 **Song S, Sjöström PJ, Reigl M, Nelson S, Chklovskii DB.** Highly nonrandom features of synaptic connectivity in local  
881 cortical circuits. In: *PLoS Biology*, edited by Friston KJ. Public Library of Science, p. 0507–0519.
- 882 **Spira ME, Hai A.** Multi-electrode array technologies for neuroscience and cardiology. *Nat. Nanotechnol.* 8Nature Publishing  
883 Group: 83–94, 2013.

- 884 **Stevenson IH, Kording KP.** How advances in neural recording affect data analysis. *Nat Neurosci* 14: 139–142, 2011.
- 885 **Stevenson IH, Rebesco JM, Miller LE, Körding KP.** Inferring functional connections between neurons. *Curr Opin*  
886 *Neurobiol* 18: 582–588, 2008.
- 887 **Tingley D, Buzsáki G.** Transformation of a Spatial Map across the Hippocampal-Lateral Septal Circuit. *Neuron* 98: 1229-  
888 1242.e5, 2018.
- 889 **Volgushev M, Ilin V, Stevenson IH.** Identifying and Tracking Simulated Synaptic Inputs from Neuronal Firing: Insights from  
890 In Vitro Experiments. *PLOS Comput Biol* 11: e1004167, 2015.
- 891 **Zaytsev Y V., Morrison A, Deger M.** Reconstruction of recurrent synaptic connectivity of thousands of neurons from  
892 simulated spiking activity. *J Comput Neurosci* 39: 77–103, 2015.
- 893
